# Supplementary material for: Synthesis, cytotoxicity and antioxidant activity of new 1,3-dimethyl-8-(chromon-3-yl)-xanthine derivatives containing 2,6-di-tert-butylphenol fragments
Source: Royal Society of Chemistry journal article supplement (doi:10.1039/d1nj03726a), 2021-11-17
Supplement: d1nj03726a1.pdf [file d1nj03726a1.pdf]

New Journal of Chemistry

Supplementary information

**SYNTHESIS, CYTOTOXIC AND ANTIOXIDANT ACTIVITY OF NEW  
1,3-DIMETHYL-8-(CHROMON-3-YL)-XANTHINE DERIVATIVES  
CONTAINING 2,6-DI-TERT-BUTYLPHENOL FRAGMENT**

Stanislav S. Shatokhin, Vladislav A. Tuskaev, Svetlana Ch. Gagieva, Alina A. Markova, Dmitry I. Pozdnyakov, Gleb L. Denisov, Elizaveta K. Melnikova, Boris M. Bulychev, Eduard T. Oganesyanyan

**Table of Contents**

|                                                                                                                                                                               |       |
|-------------------------------------------------------------------------------------------------------------------------------------------------------------------------------|-------|
| ESI-MS-, <sup>1</sup> H NMR and <sup>13</sup> C NMR spectra of compounds <b>1-13</b> .....                                                                                    | 1-20  |
| <b>Table S1.</b> Crystal data and structure refinement parameters for <b>2</b> . .....                                                                                        | 20-21 |
| <b>Table S2.</b> Bond lengths and angles for compound <b>2</b> .....                                                                                                          | 21    |
| <b>Table S3.</b> Bond angles for compound <b>2</b> .....                                                                                                                      | 21-22 |
| <b>Table S4.</b> Comparison of selected bond distances of compound <b>2</b> determined theoretically (from DFT calculation) and experimentally (from crystal structure) ..... | 22    |
| <b>Table S5.</b> Comparison of selected angles (°) of compound <b>2</b> determined theoretically (from DFT calculation) and experimentally (from crystal structure) .....     | 23    |
| <b>Figure S38.</b> Visualization of HOMO/LUMO for compounds <b>3-6</b> .....                                                                                                  | 24    |
| <b>Figure S39.</b> Visualization of HOMO/LUMO for compounds <b>7-10</b> .....                                                                                                 | 25    |
| <b>Figure S40.</b> Visualization of HOMO/LUMO for compounds <b>11-13</b> .....                                                                                                | 26    |
| <b>Table S6.</b> Calculated molecular descriptors for compounds <b>2-7</b> .....                                                                                              | 27    |
| <b>Table S7.</b> Calculated molecular descriptors for compounds <b>8-13</b> .....                                                                                             | 27    |
| <b>Table S8.</b> The predicted types of biological activity for compounds <b>2-13</b> .....                                                                                   | 28    |
| <b>Table S9.</b> Drug-Likeness of compounds <b>2-13</b> .....                                                                                                                 | 29    |
| <b>Figure S41.</b> The dependence of the survival of non-tumor fibroblasts on the concentration of compounds <b>2-9, 11, 12</b> .....                                         | 30    |
| <b>Figure S42.</b> Dependence of the survival of breast adenocarcinoma cells on the concentration of compounds <b>2-9, 11, 12</b> .....                                       | 30    |
| <b>Figure S43.</b> Dependence of the survival of colon adenocarcinoma cells on the concentration of compounds <b>2-9, 11, 12</b> .....                                        | 31    |

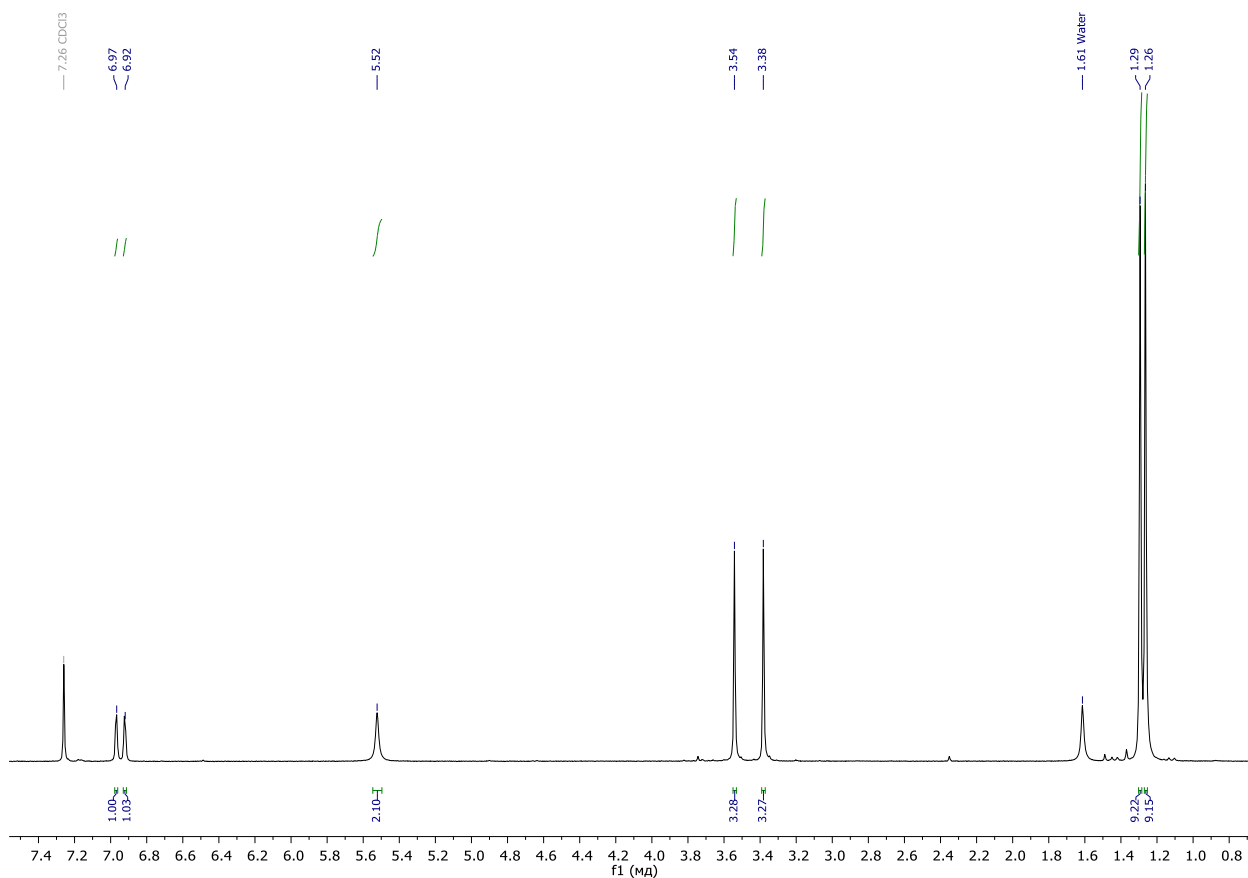

**Figure S1.** <sup>1</sup>H NMR (400 MHz) spectrum of **1** in CDCl<sub>3</sub>.

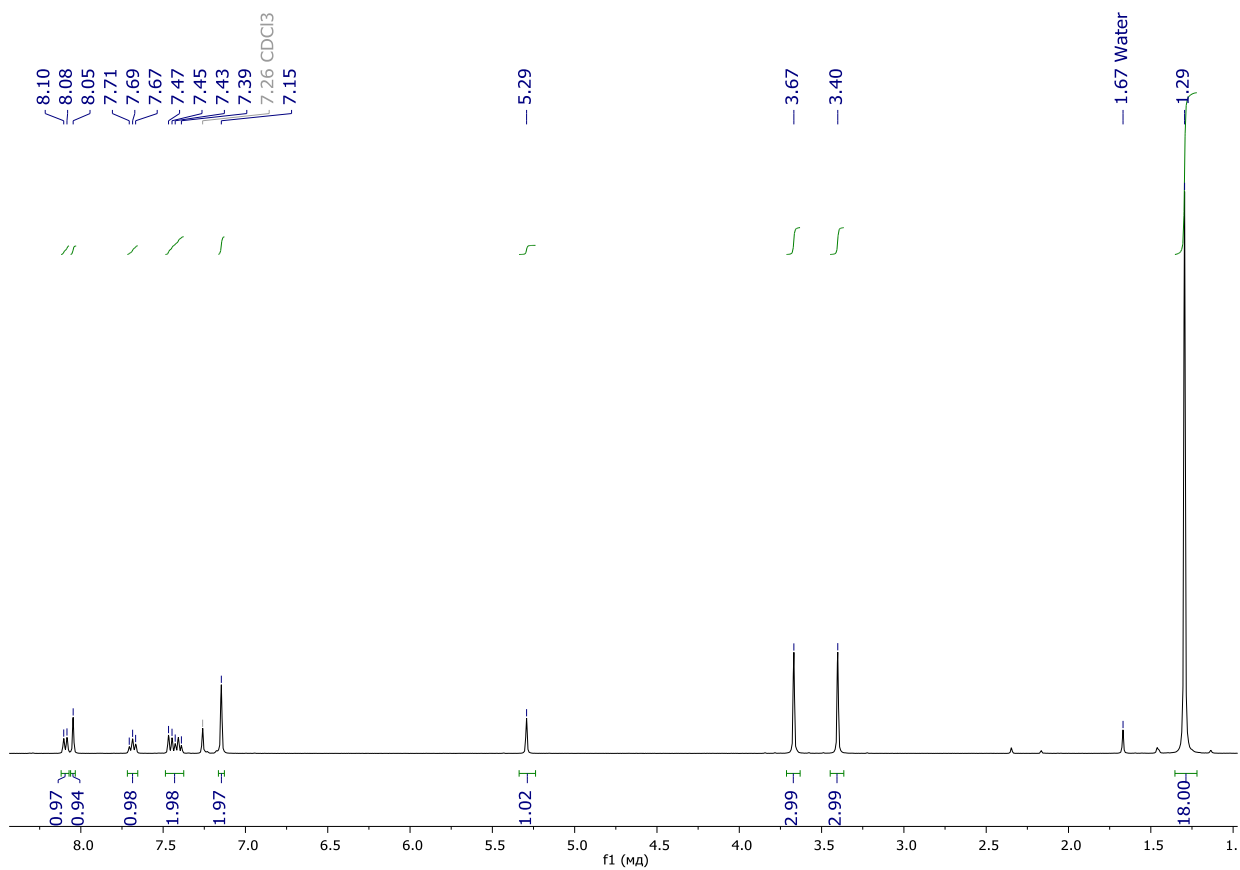

**Figure S2.** <sup>1</sup>H NMR (400 MHz) spectrum of **2** in CDCl<sub>3</sub>.

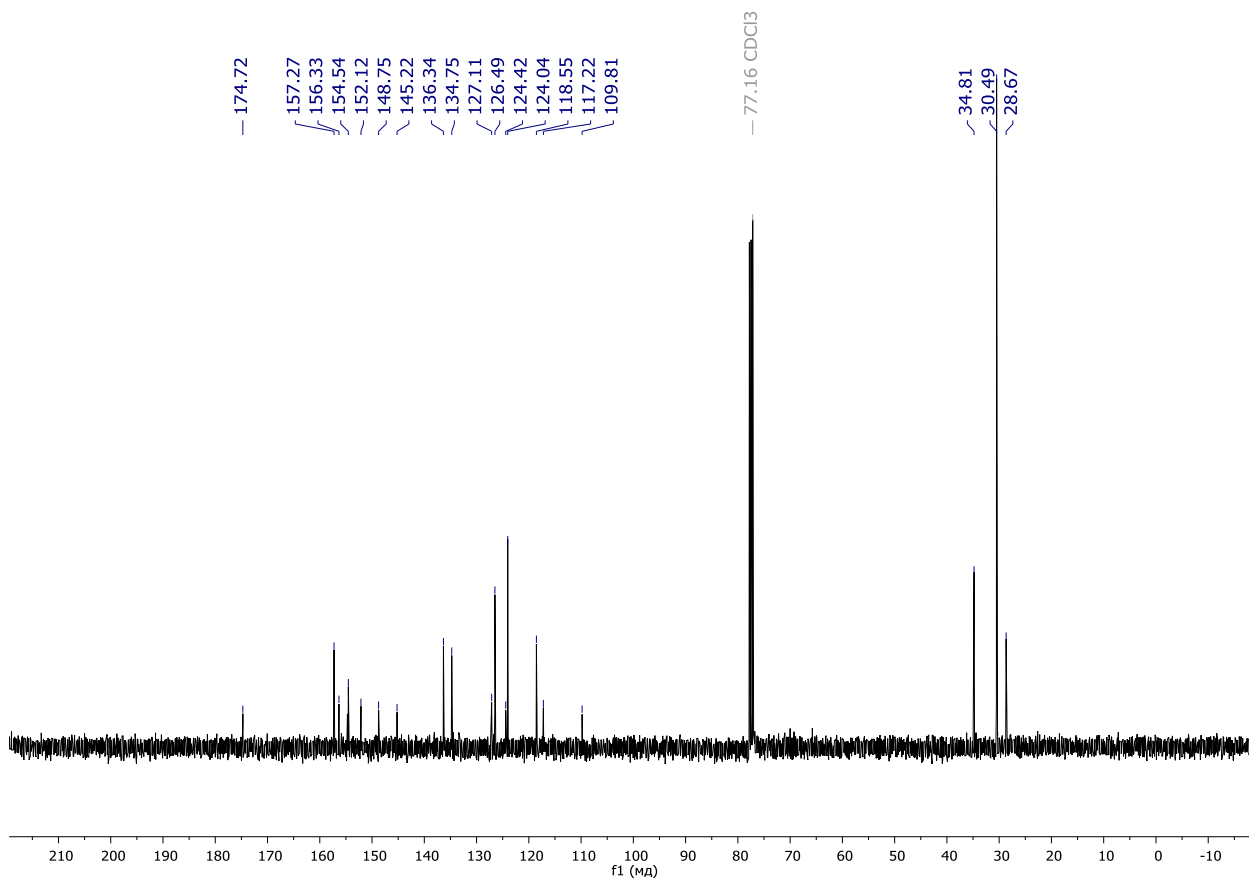

**Figure S3.** <sup>13</sup>C NMR (101 MHz) spectrum of **2** in CDCl<sub>3</sub>.

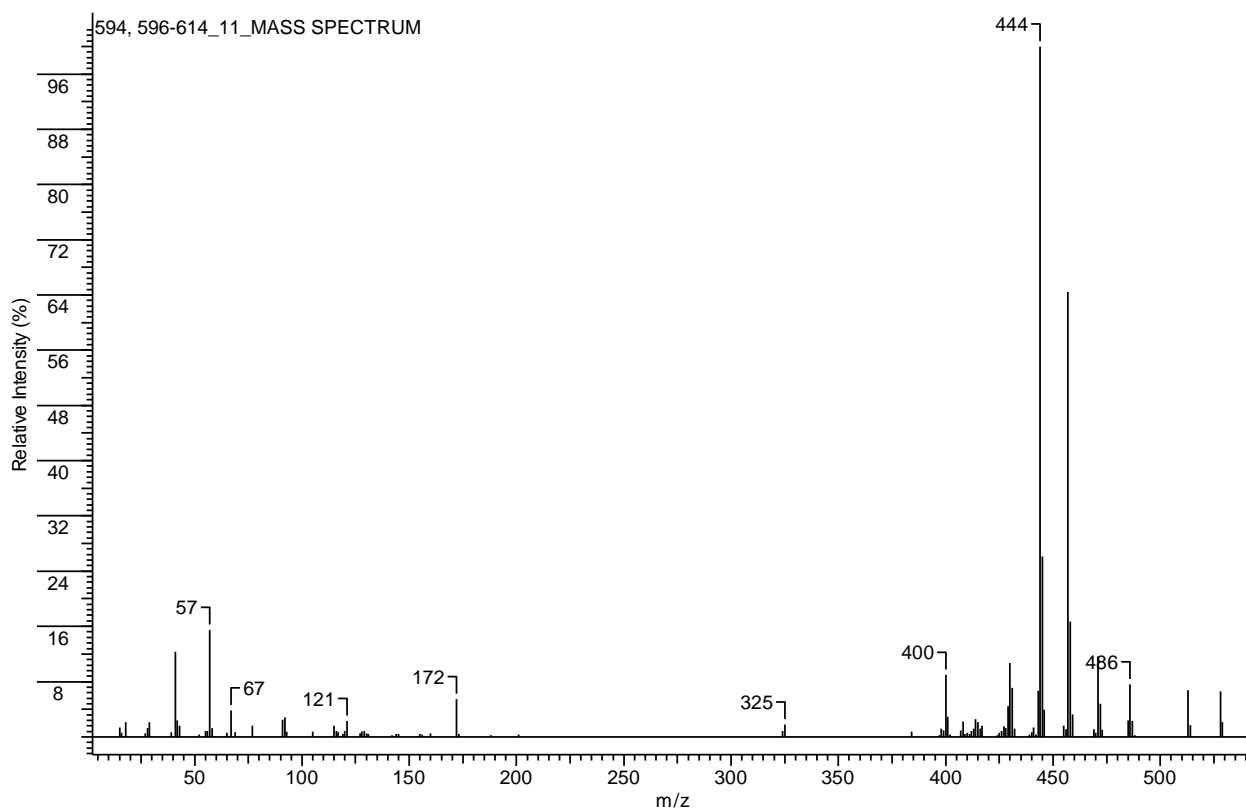

**Figure S4.** ESI-MS spectrum of **2**.

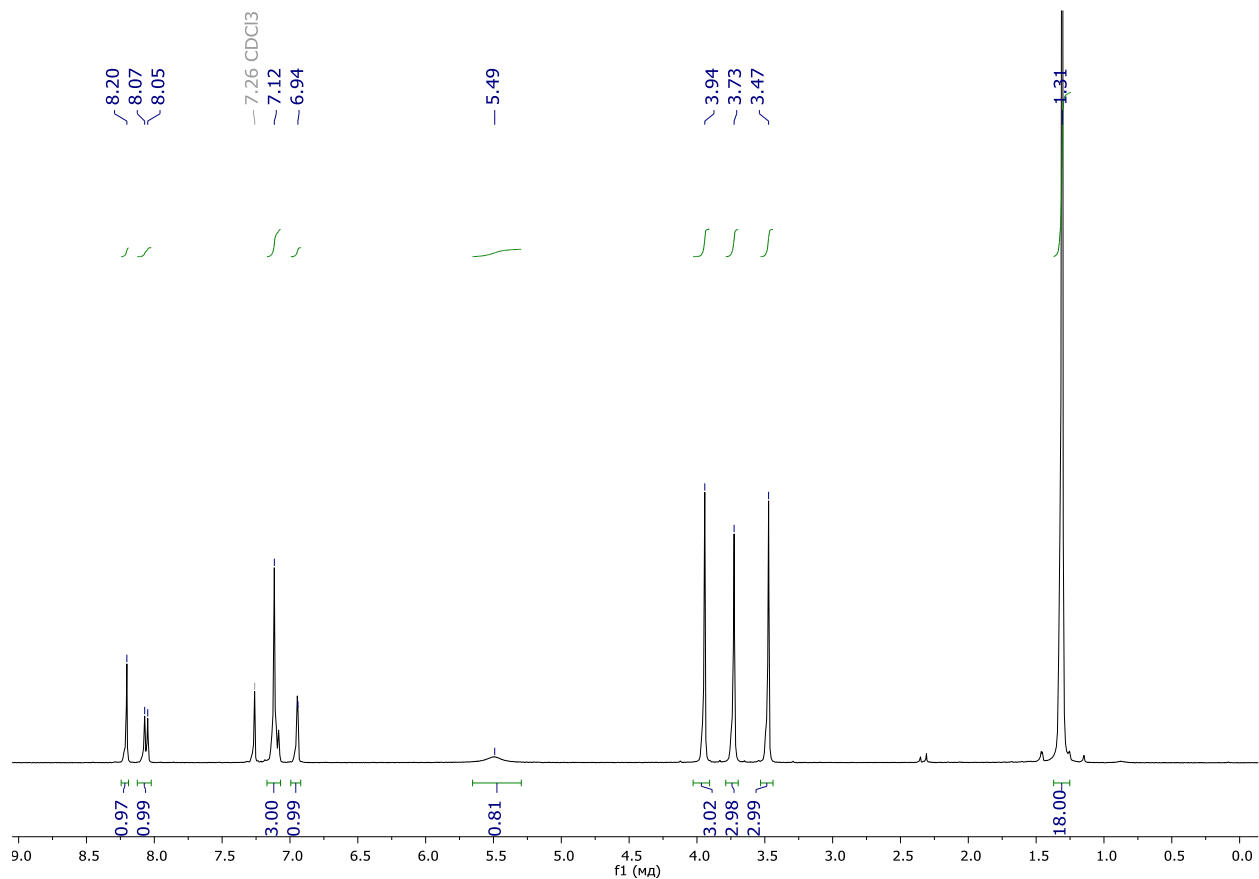

**Figure S5.** <sup>1</sup>H NMR (400 MHz) spectrum of **3** in CDCl<sub>3</sub>.

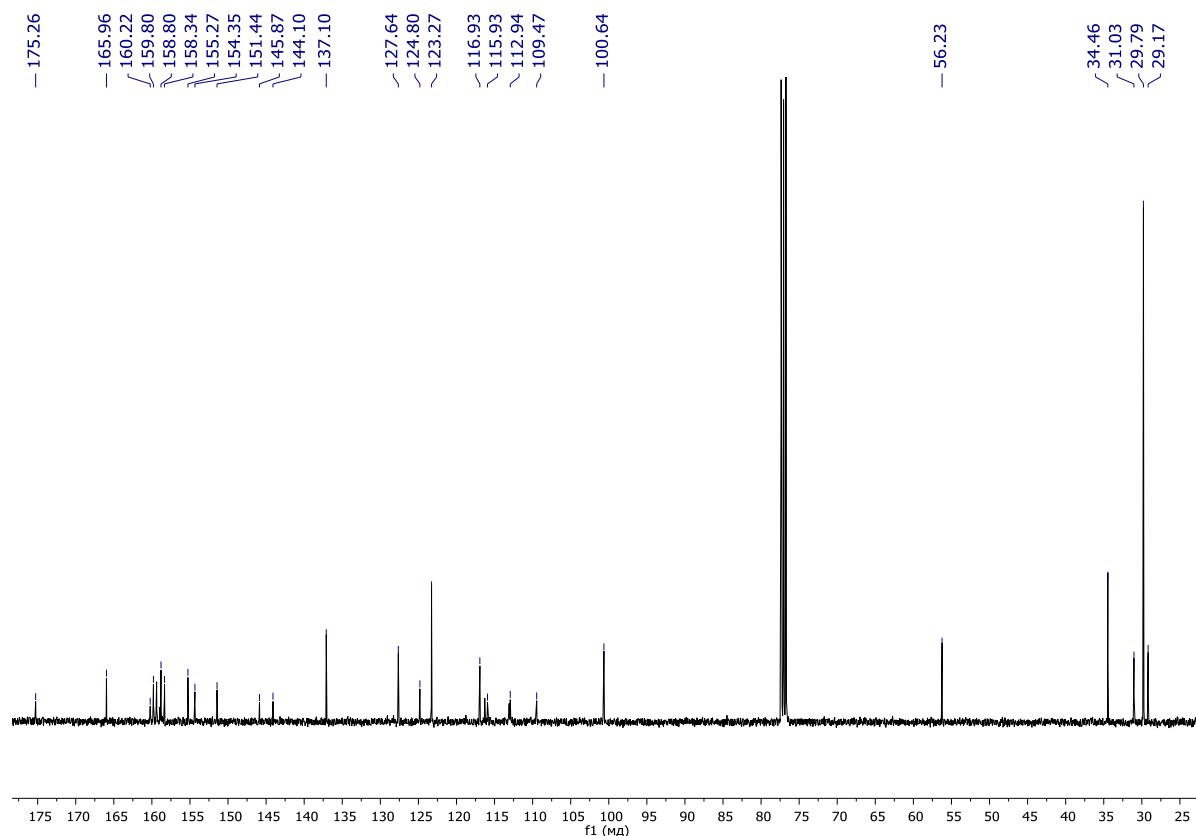

**Figure S6.** <sup>13</sup>C NMR (101 MHz) spectrum of **3** in CDCl<sub>3</sub>.

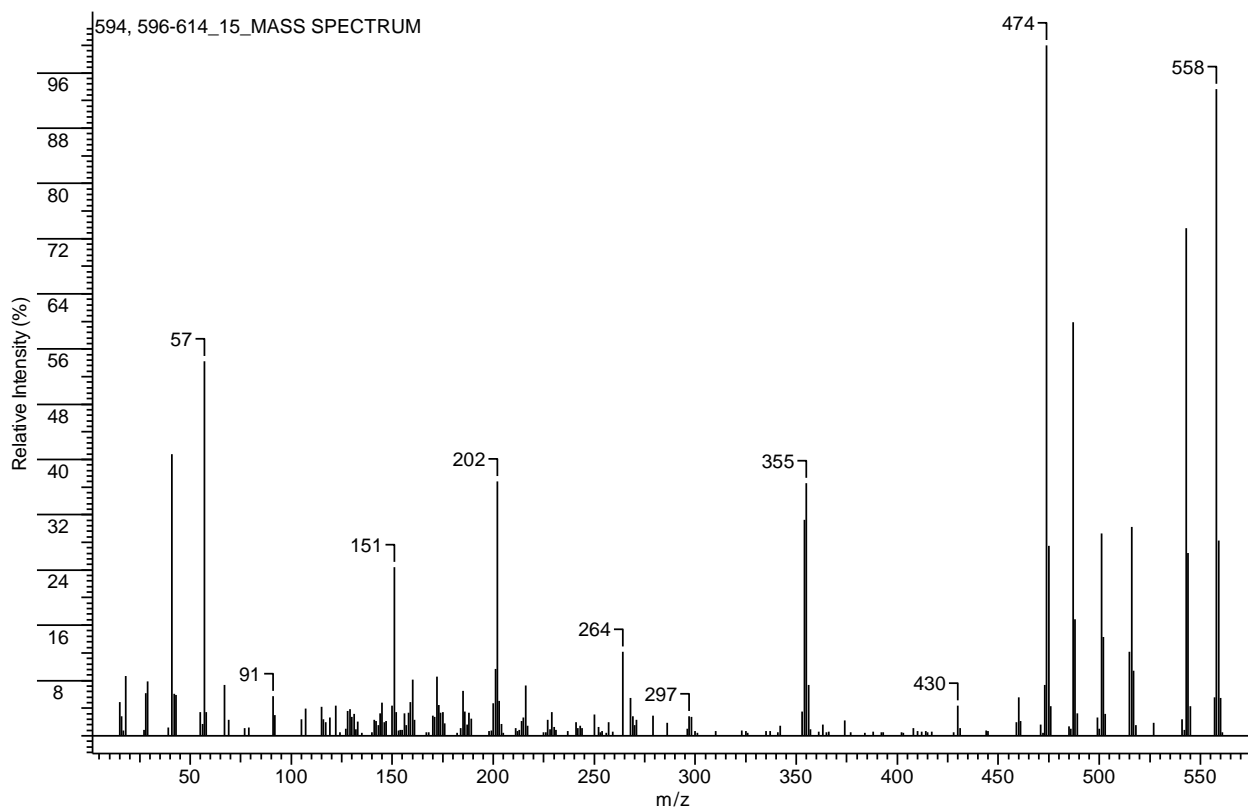

**Figure S7.** ESI-MS spectrum of **3**.

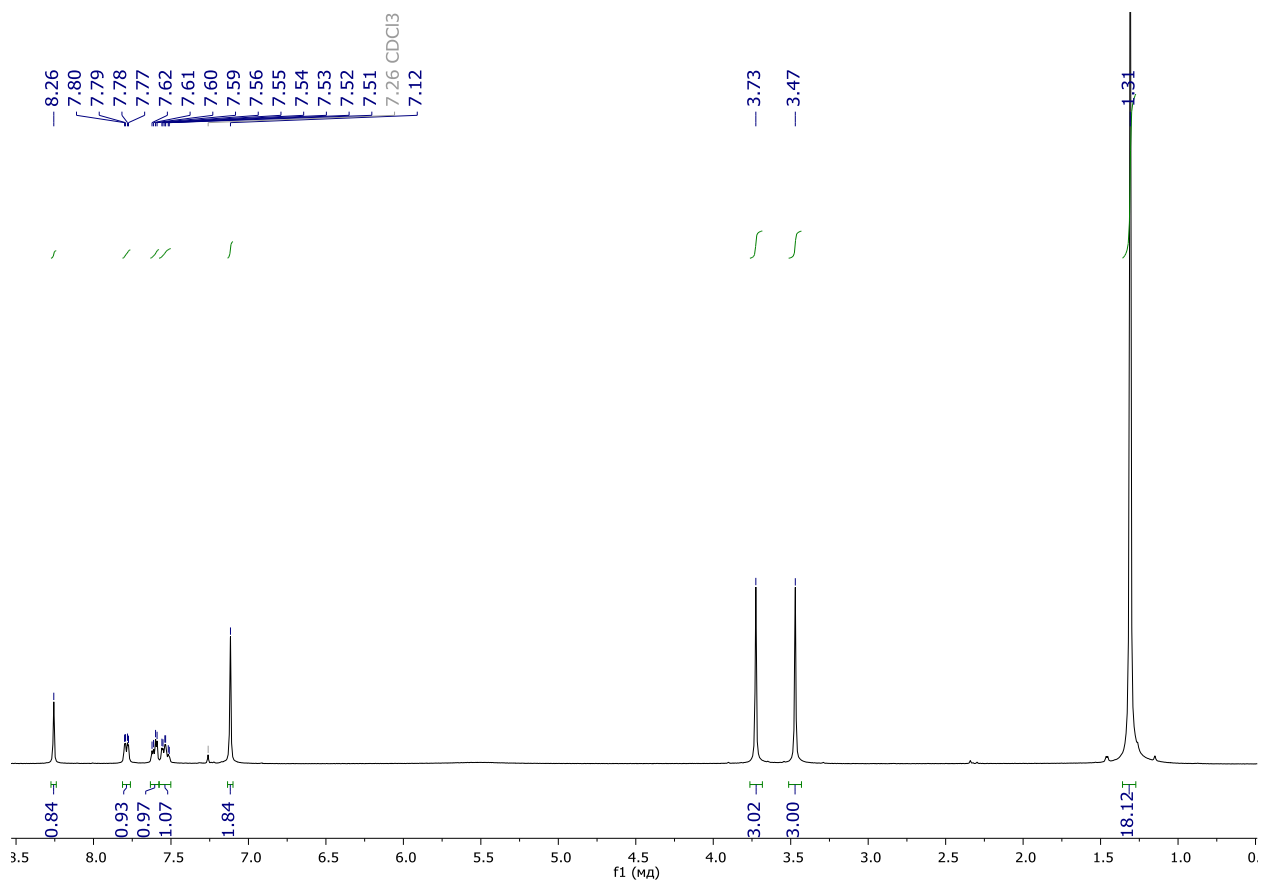

**Figure S8.**  $^1\text{H}$  NMR (400 MHz) spectrum of **4** in  $\text{CDCl}_3$ .

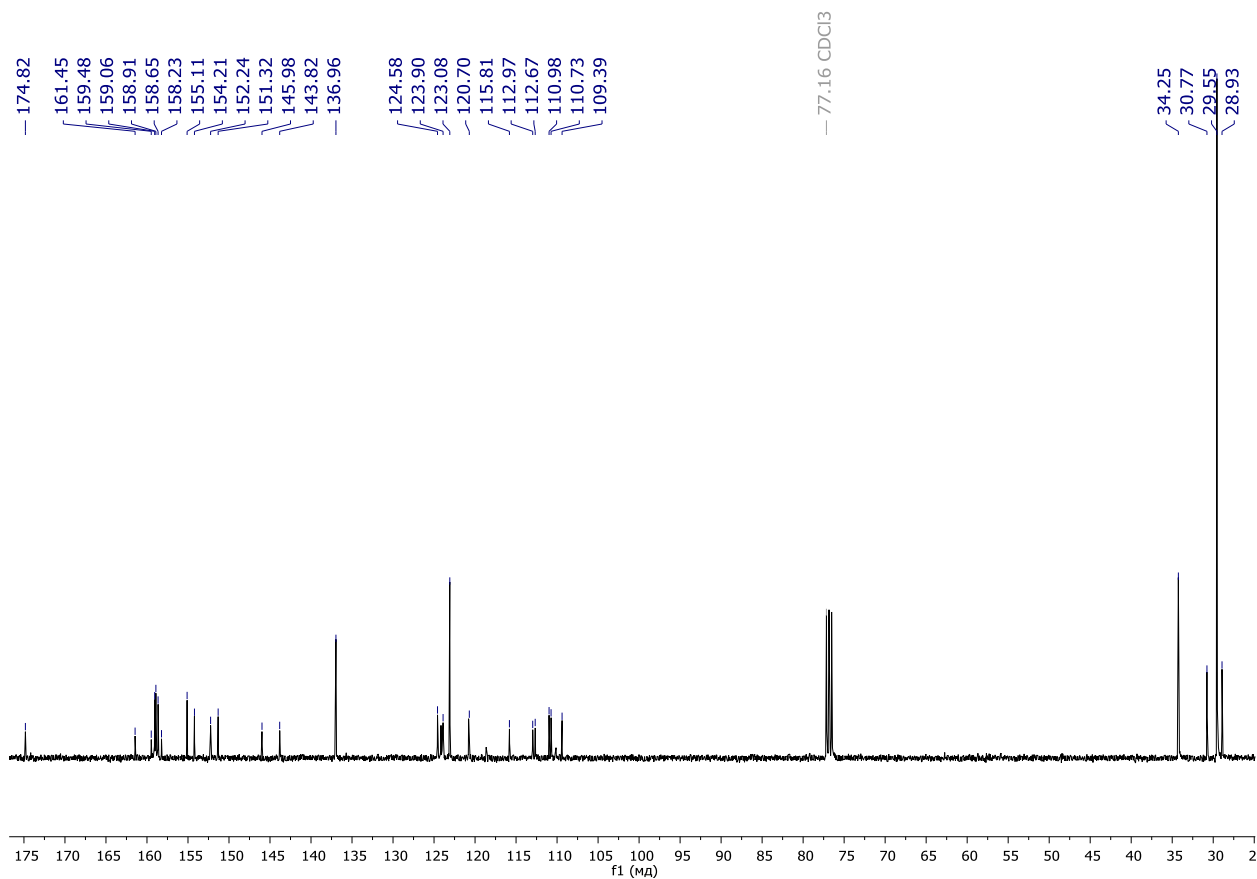

**Figure S9.**  $^{13}\text{C}$  NMR (101 MHz) spectrum of **4** in  $\text{CDCl}_3$ .

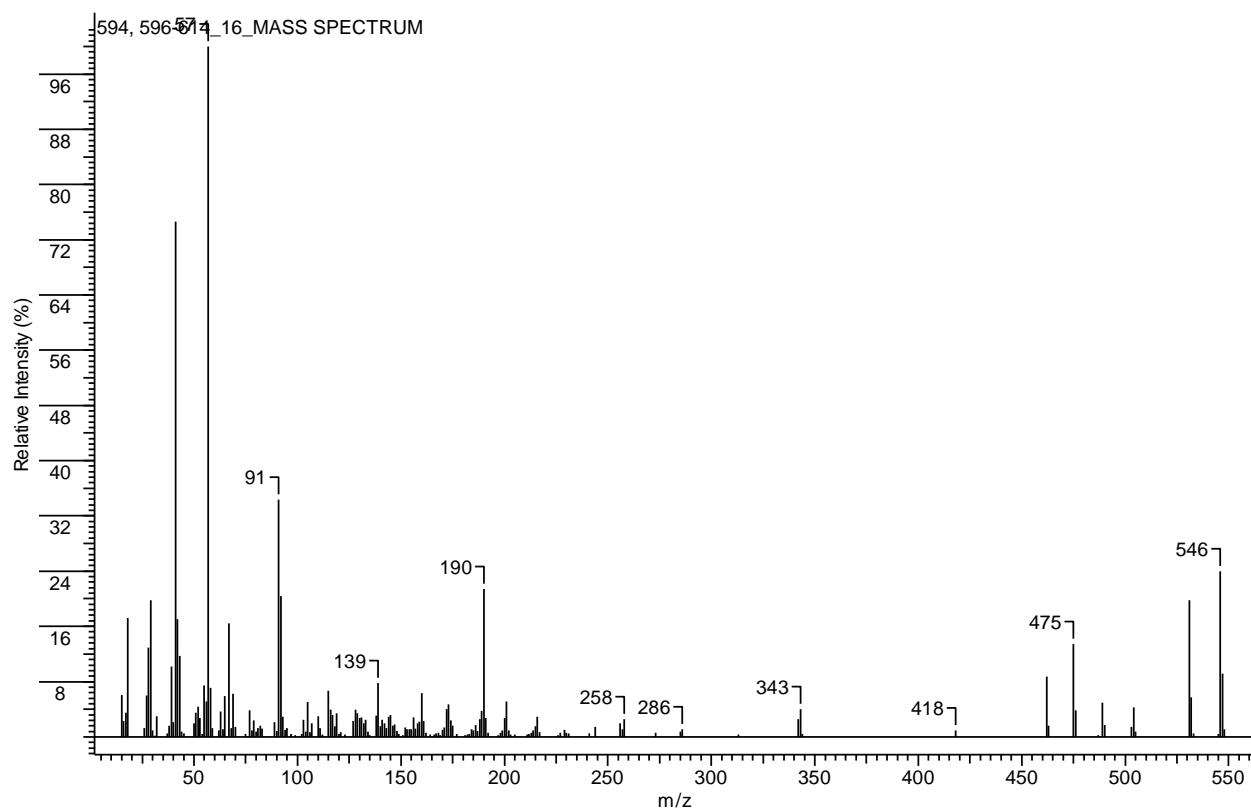

**Figure S10.** ESI-MS spectrum of **4**.

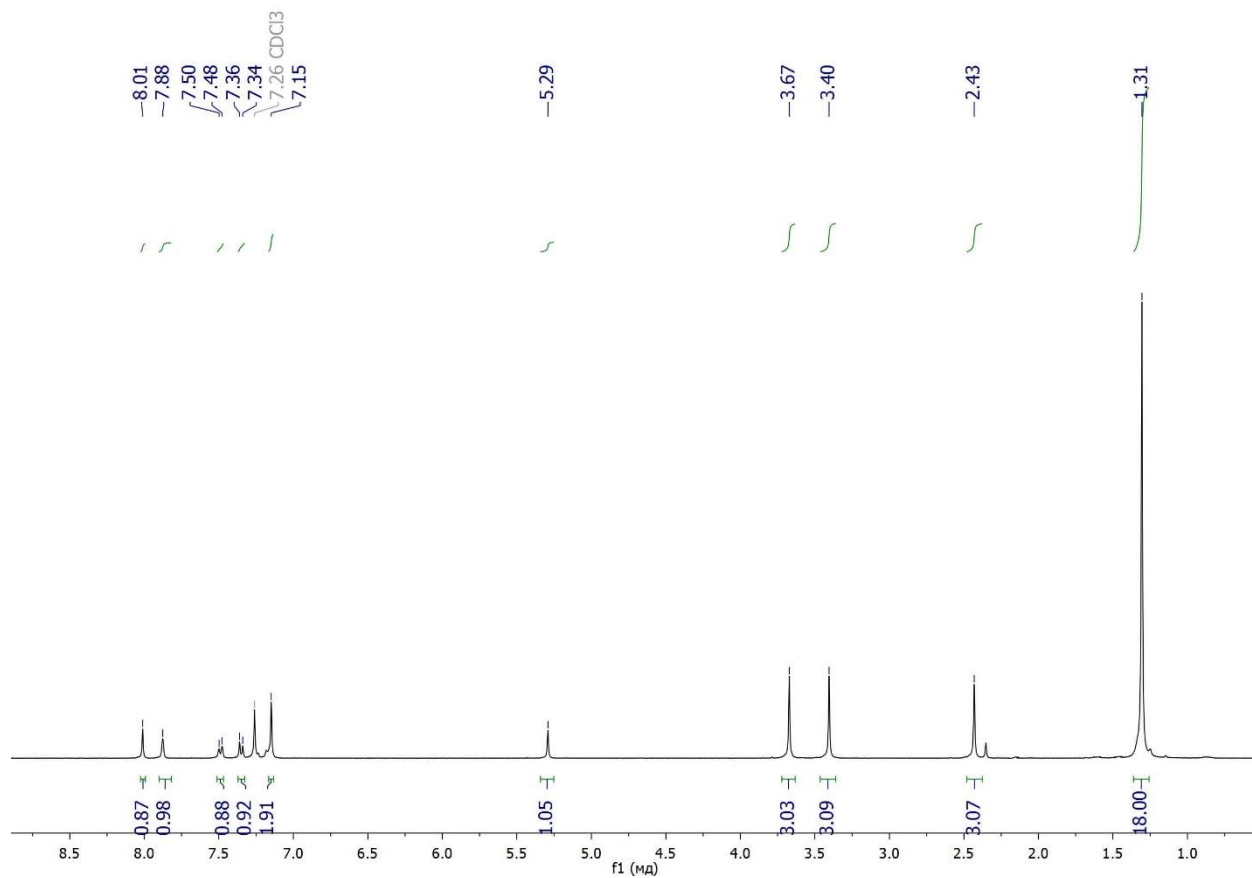

**Figure S11.** <sup>1</sup>H NMR (400 MHz) spectrum of **5** in CDCl<sub>3</sub>.

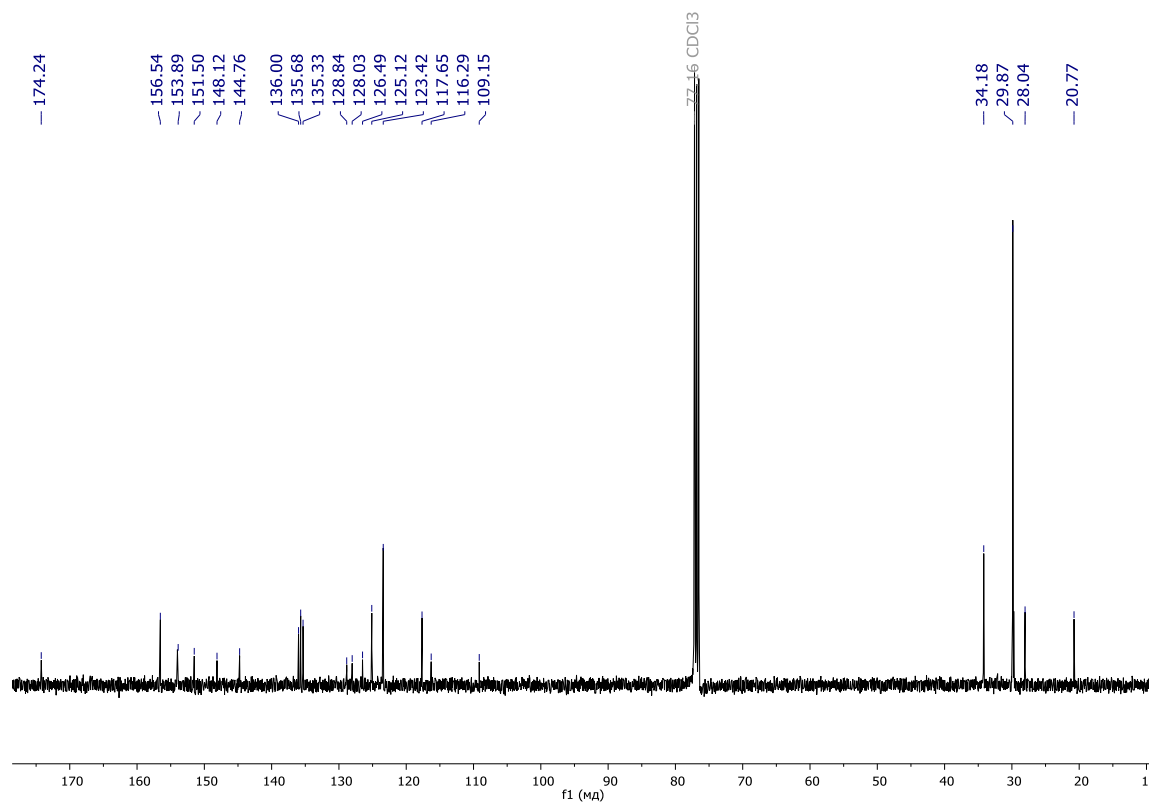

**Figure S12.** <sup>13</sup>C NMR (101 MHz) spectrum of **5** in CDCl<sub>3</sub>.

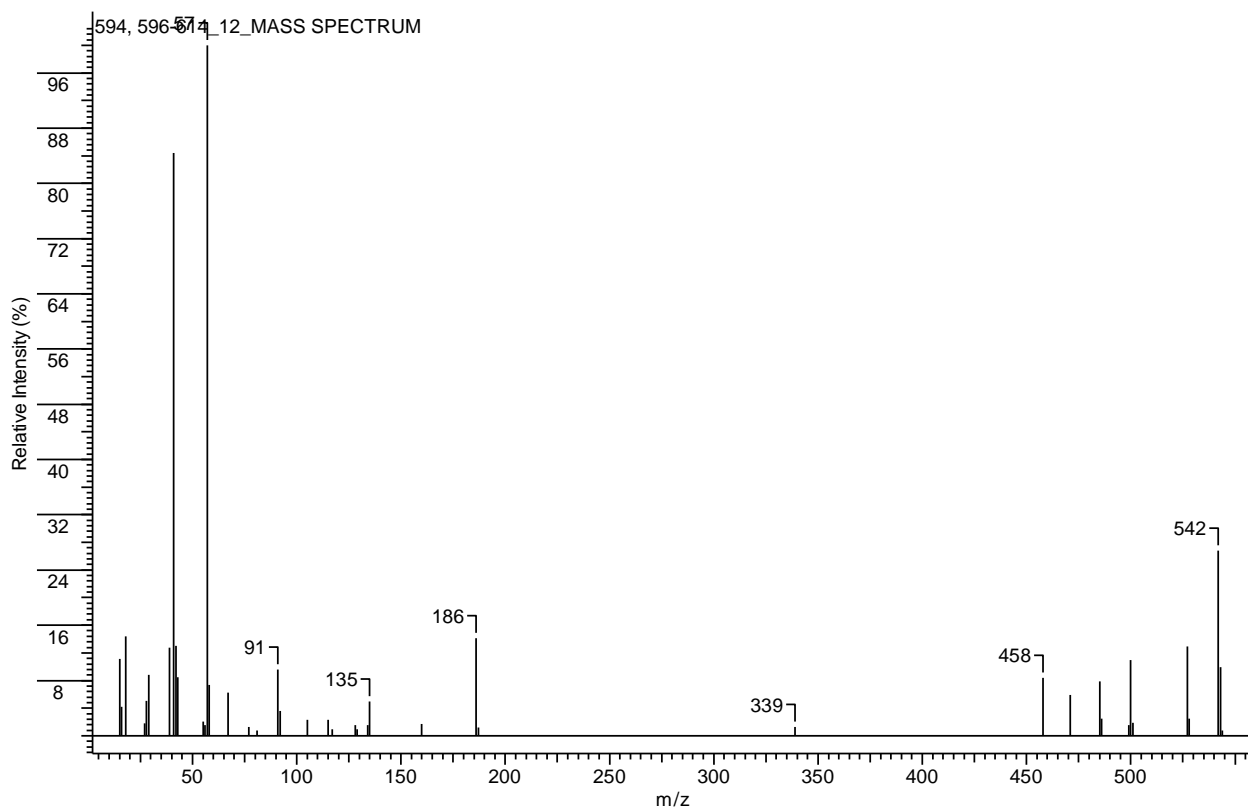

**Figure S13.** ESI-MS spectrum of **5**.

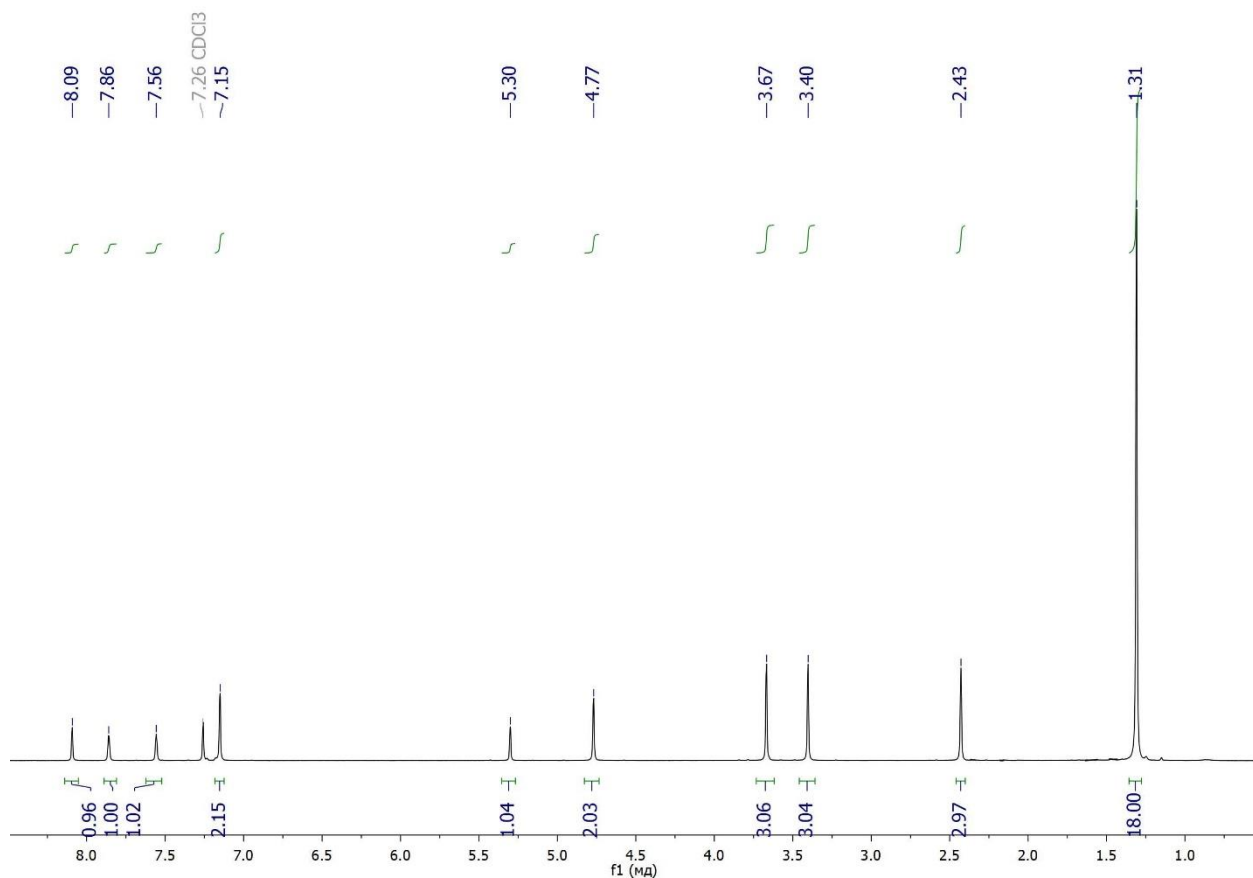

**Figure S14.** <sup>1</sup>H NMR (400 MHz) spectrum of **6** in CDCl<sub>3</sub>.



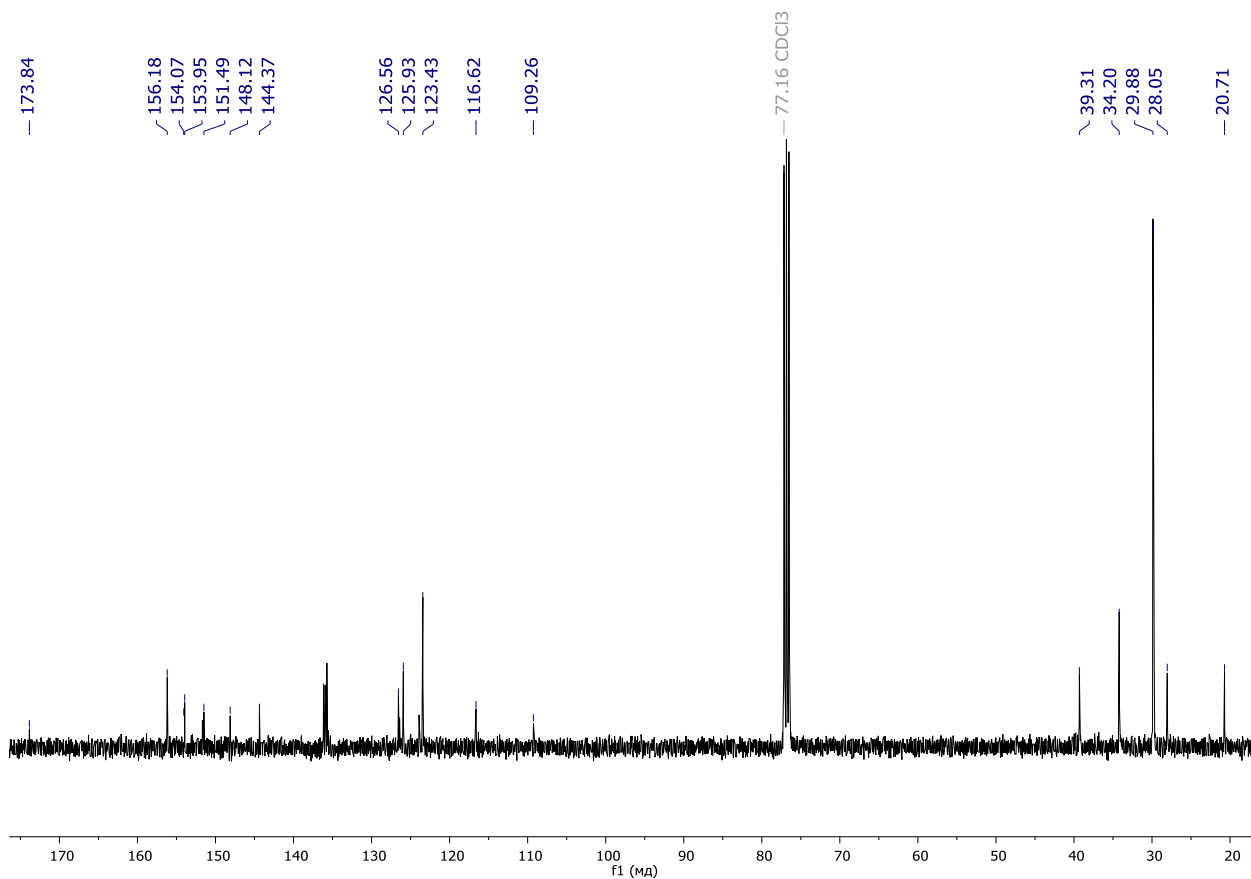

**Figure S15.** <sup>13</sup>C NMR (101 MHz) spectrum of **6** in CDCl<sub>3</sub>.

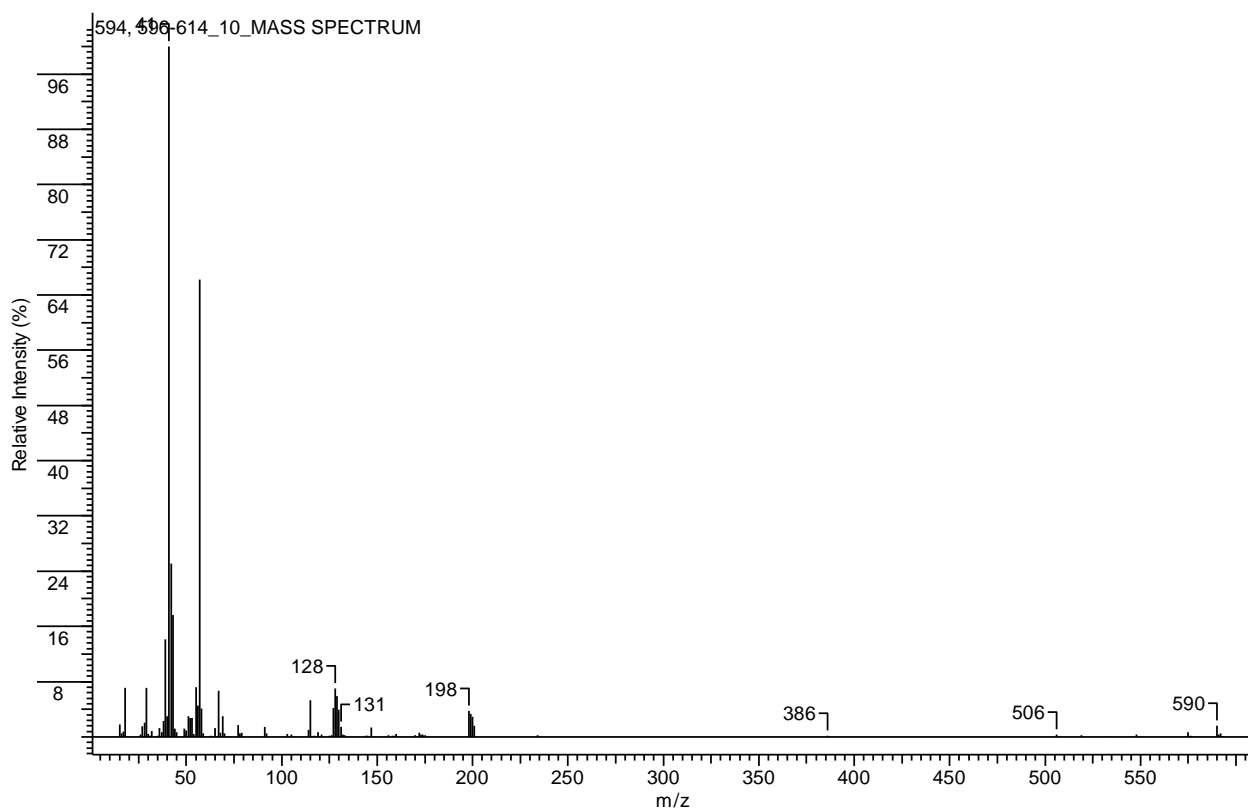

**Figure S16.** ESI-MS spectrum of **6**.

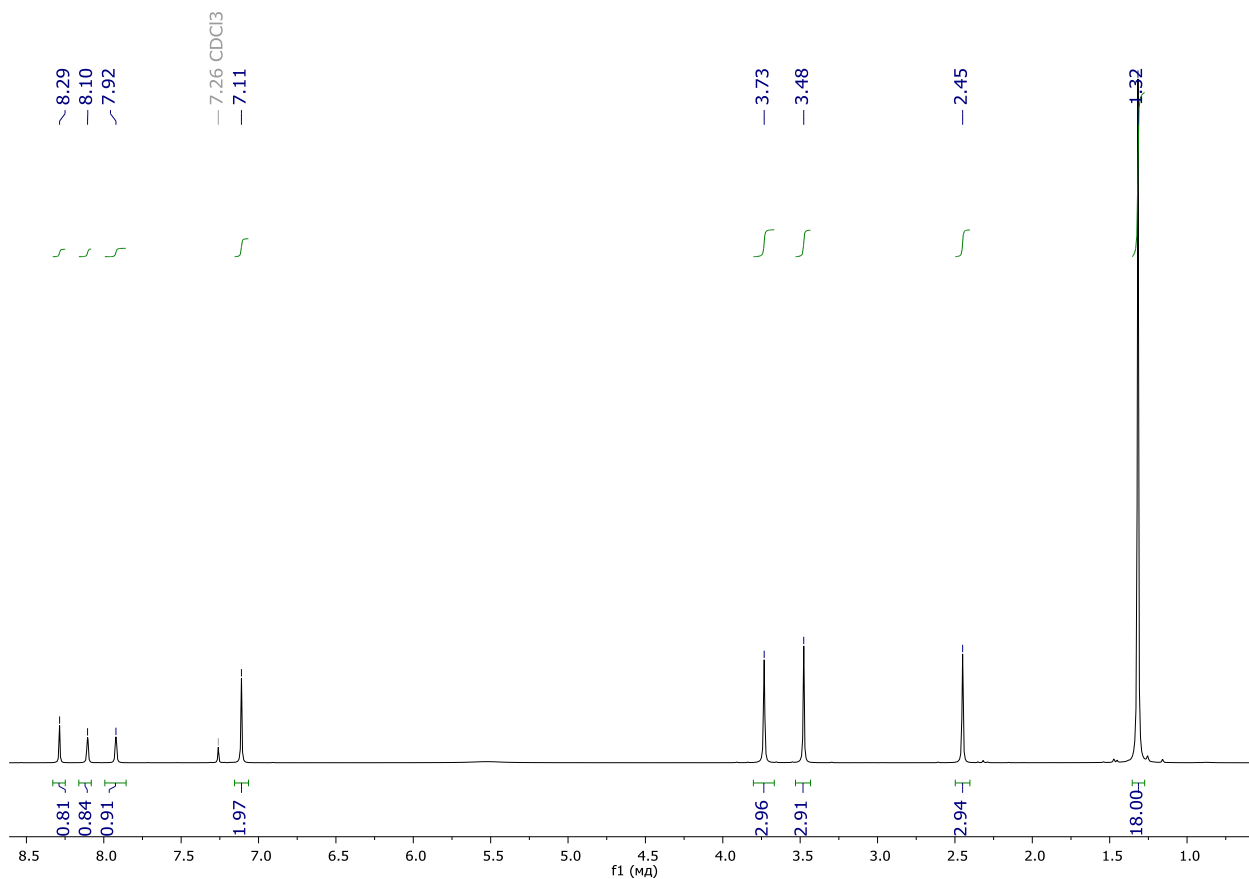

**Figure S17.** <sup>1</sup>H NMR (400 MHz) spectrum of **7** in CDCl<sub>3</sub>.

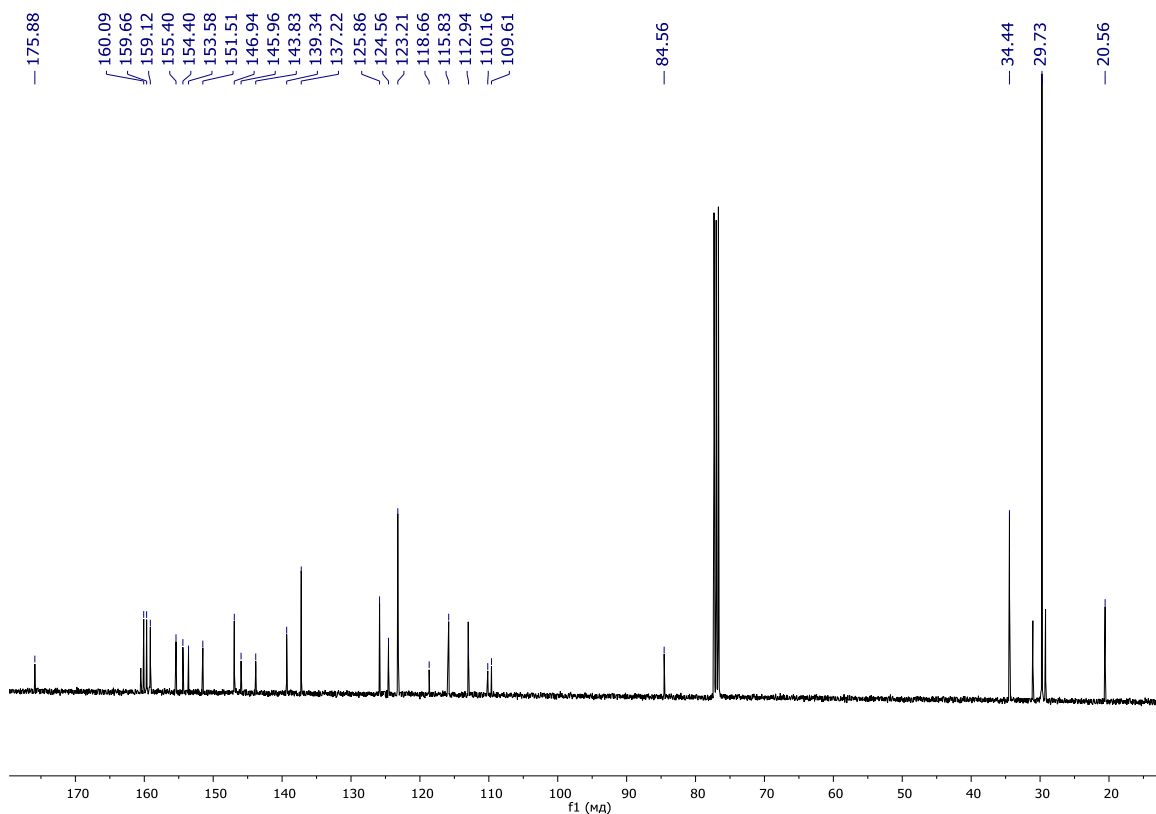

**Figure S18.** <sup>13</sup>C NMR (101 MHz) spectrum of **7** in CDCl<sub>3</sub>.

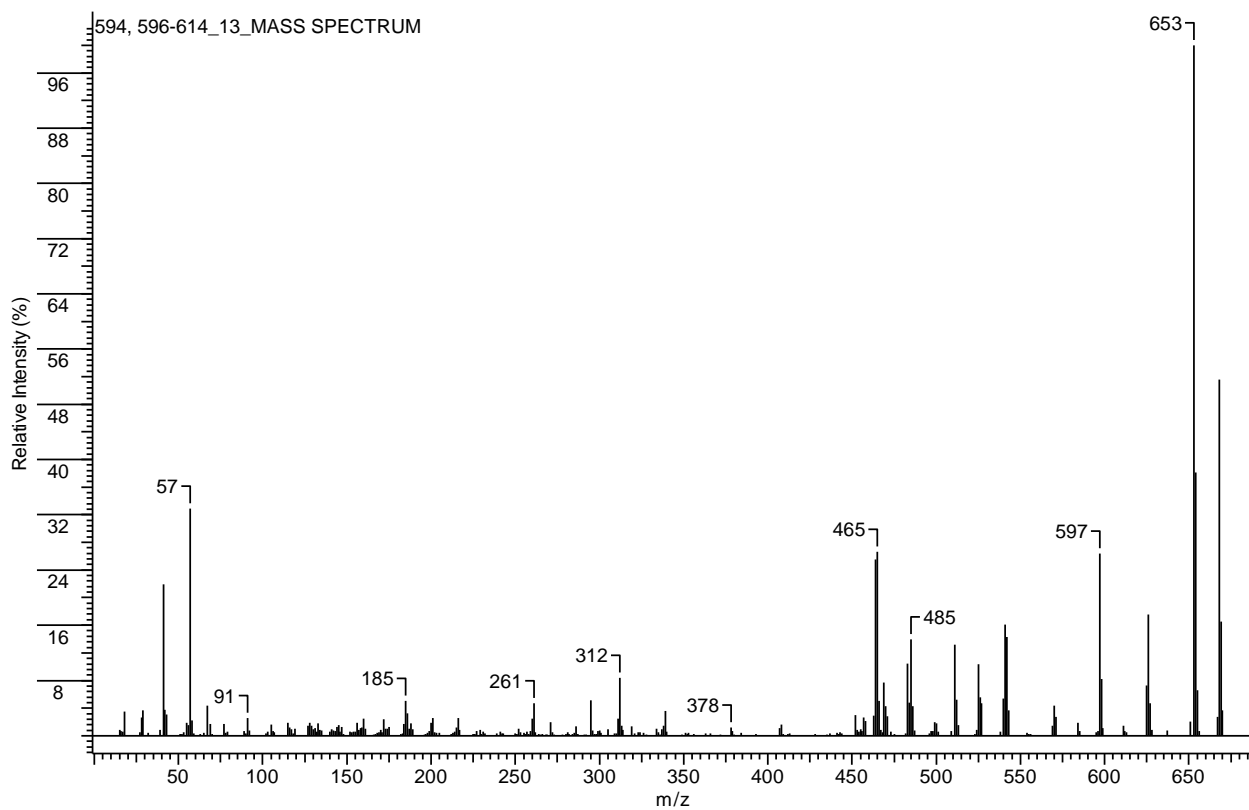

**Figure S19.** ESI-MS spectrum of **7**.

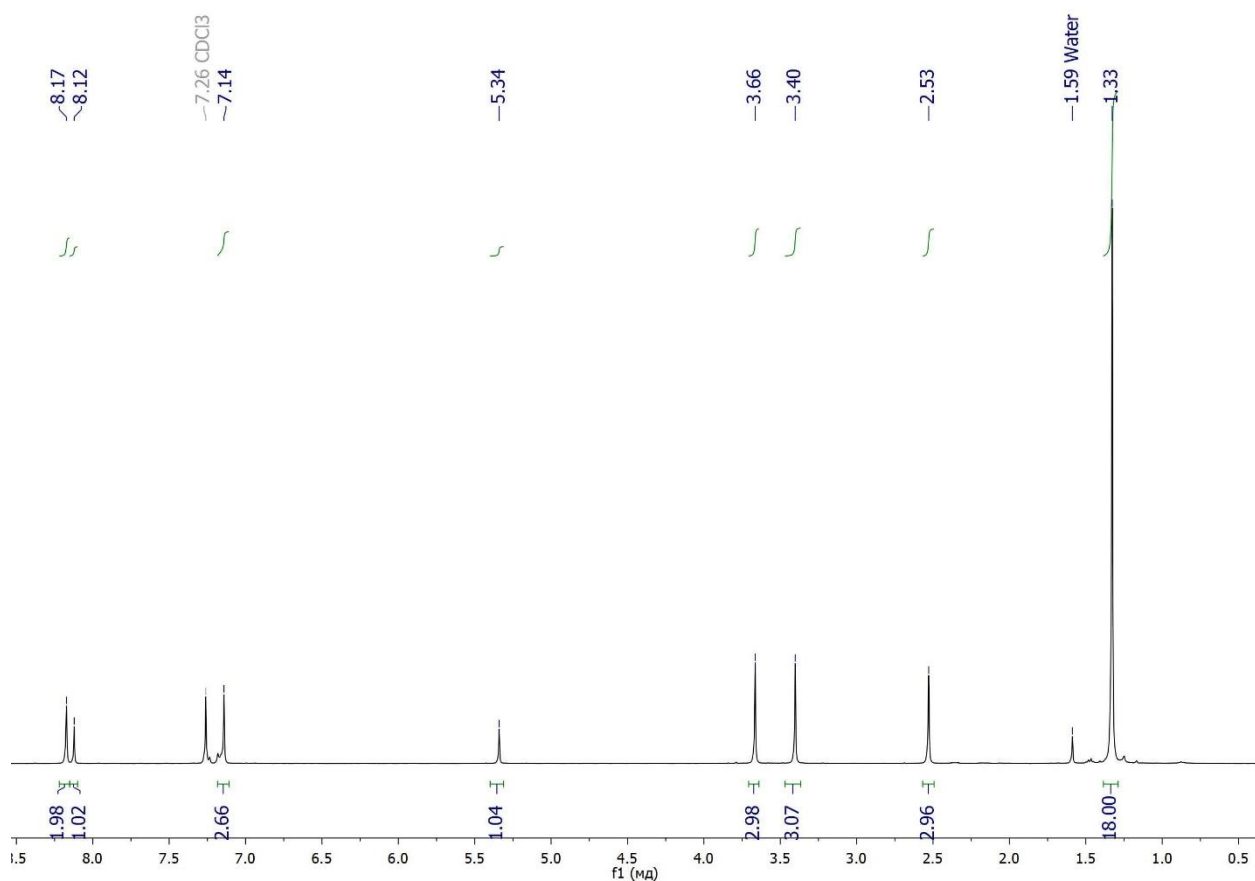

**Figure S20.** <sup>1</sup>H NMR (400 MHz) spectrum of **8** in CDCl<sub>3</sub>.

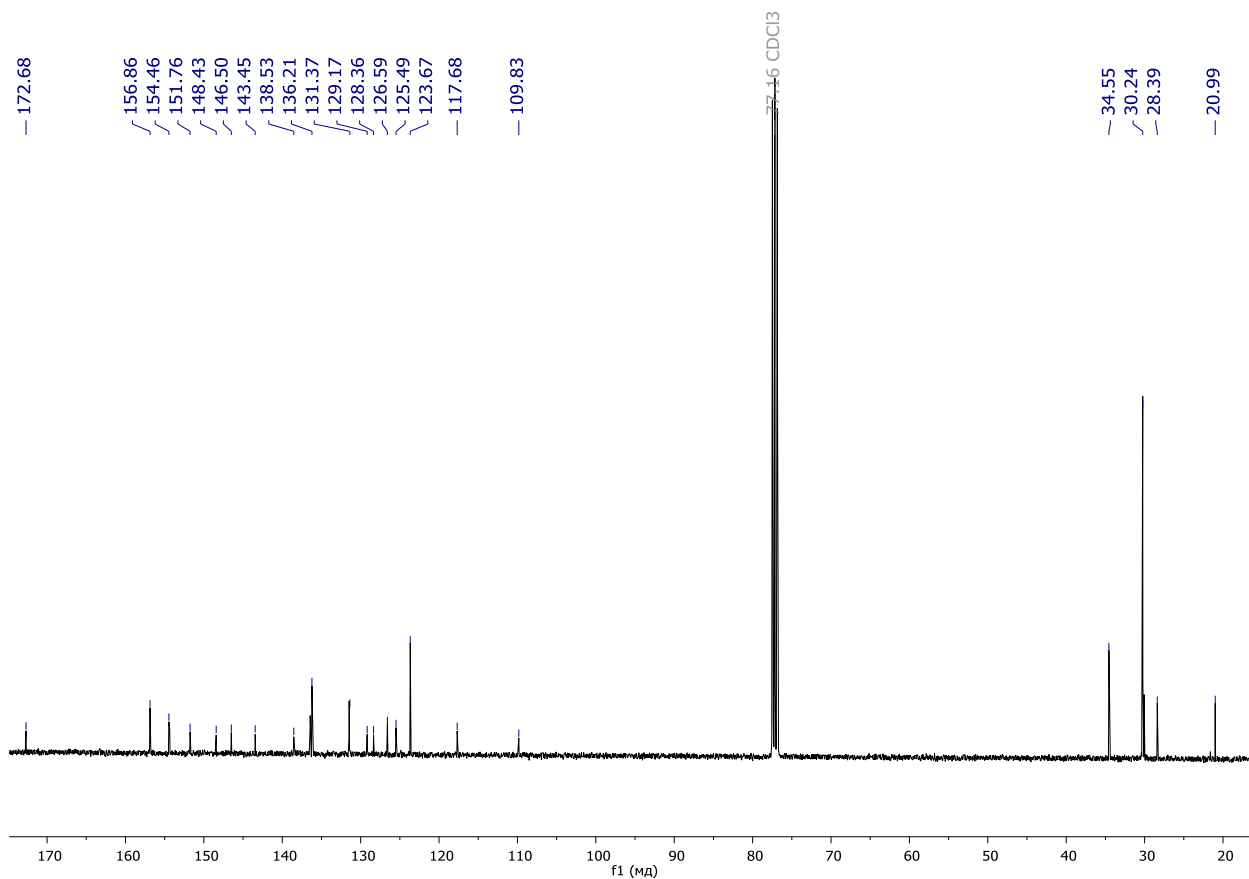

**Figure S21.**  $^{13}\text{C}$  NMR (101 MHz) spectrum of **8** in  $\text{CDCl}_3$ .

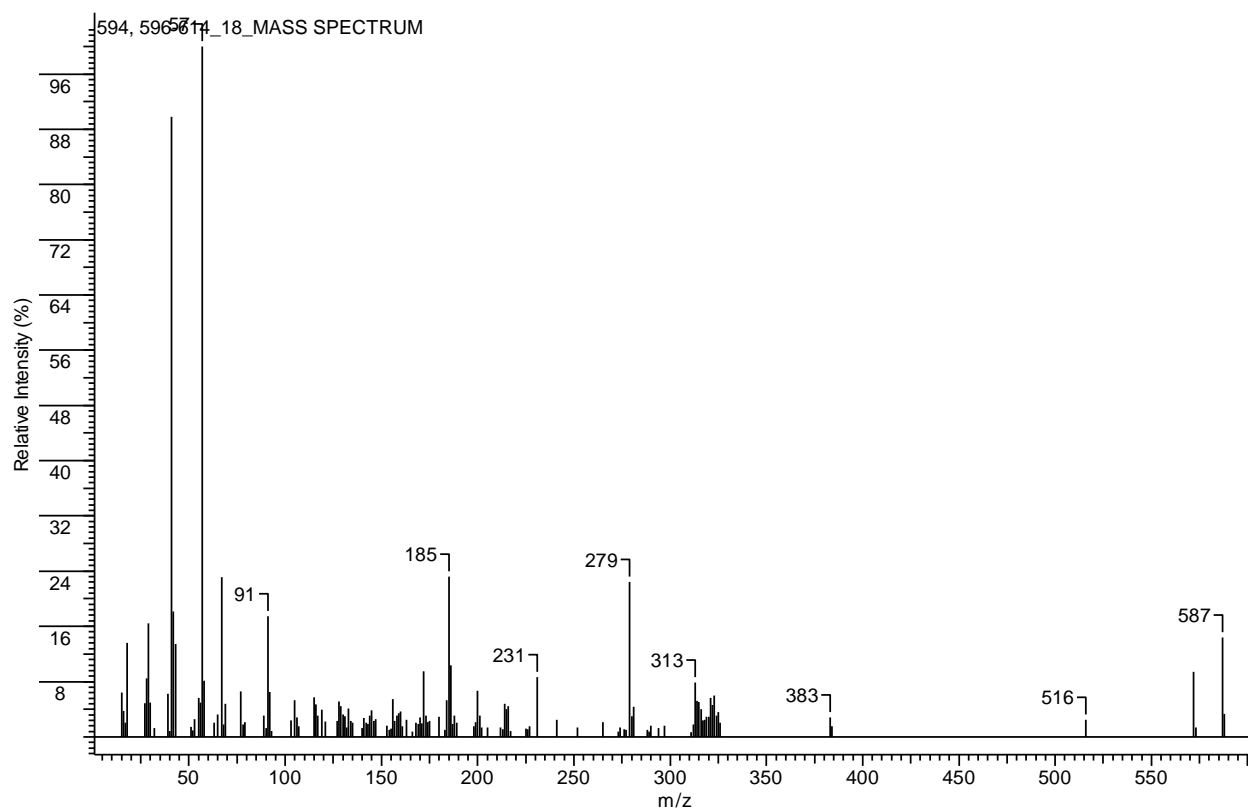

**Figure S22.** ESI-MS spectrum of **8**.

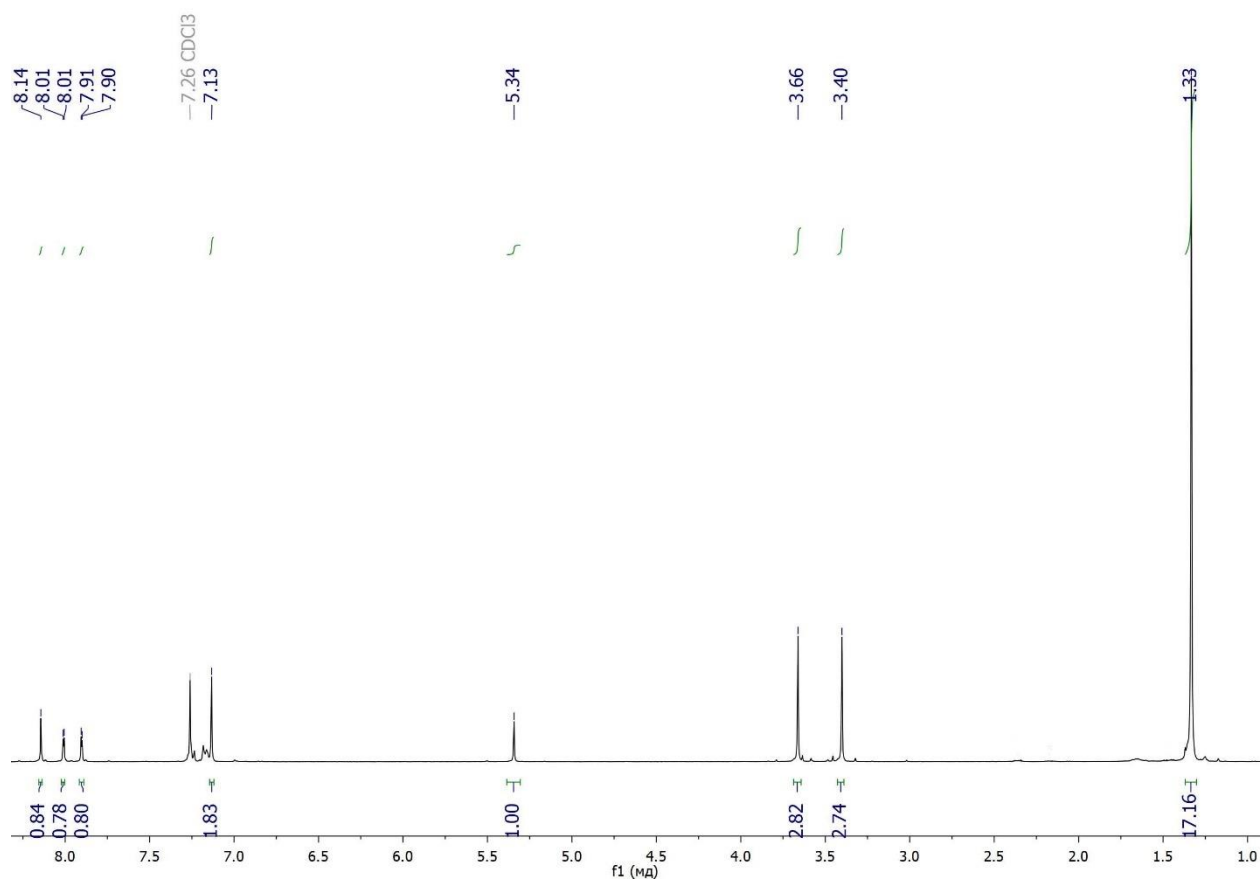

**Figure S23.** <sup>1</sup>H NMR (400 MHz) spectrum of **9** in CDCl<sub>3</sub>.

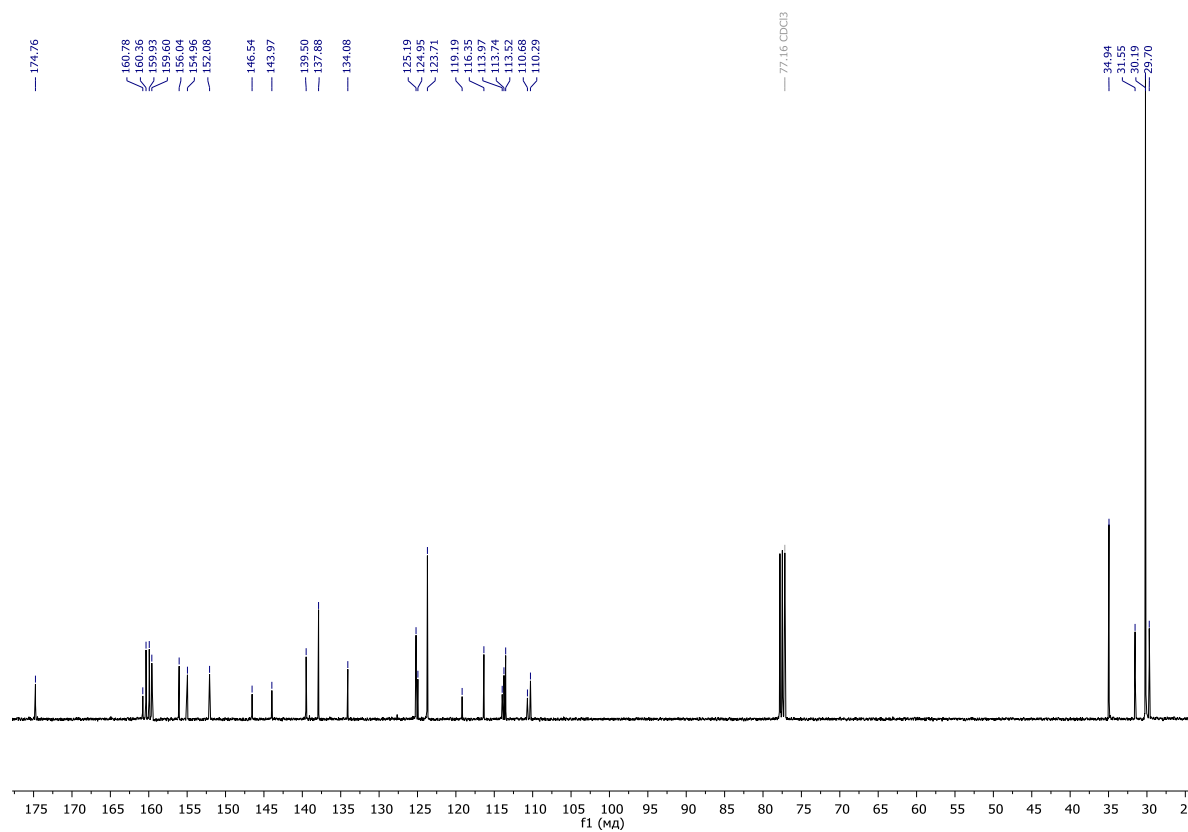

**Figure S24.** <sup>13</sup>C NMR (101 MHz) spectrum of **9** in CDCl<sub>3</sub>.

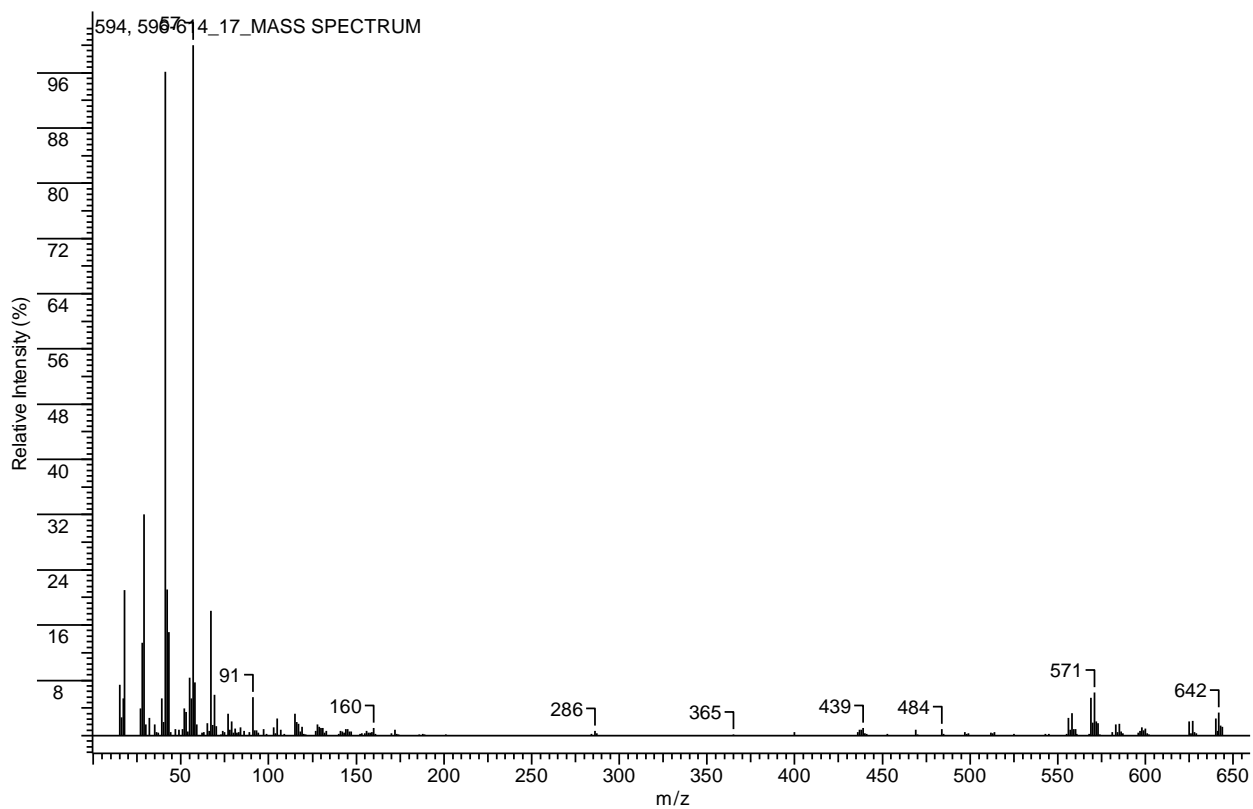

**Figure S25.** ESI-MS spectrum of **9**.

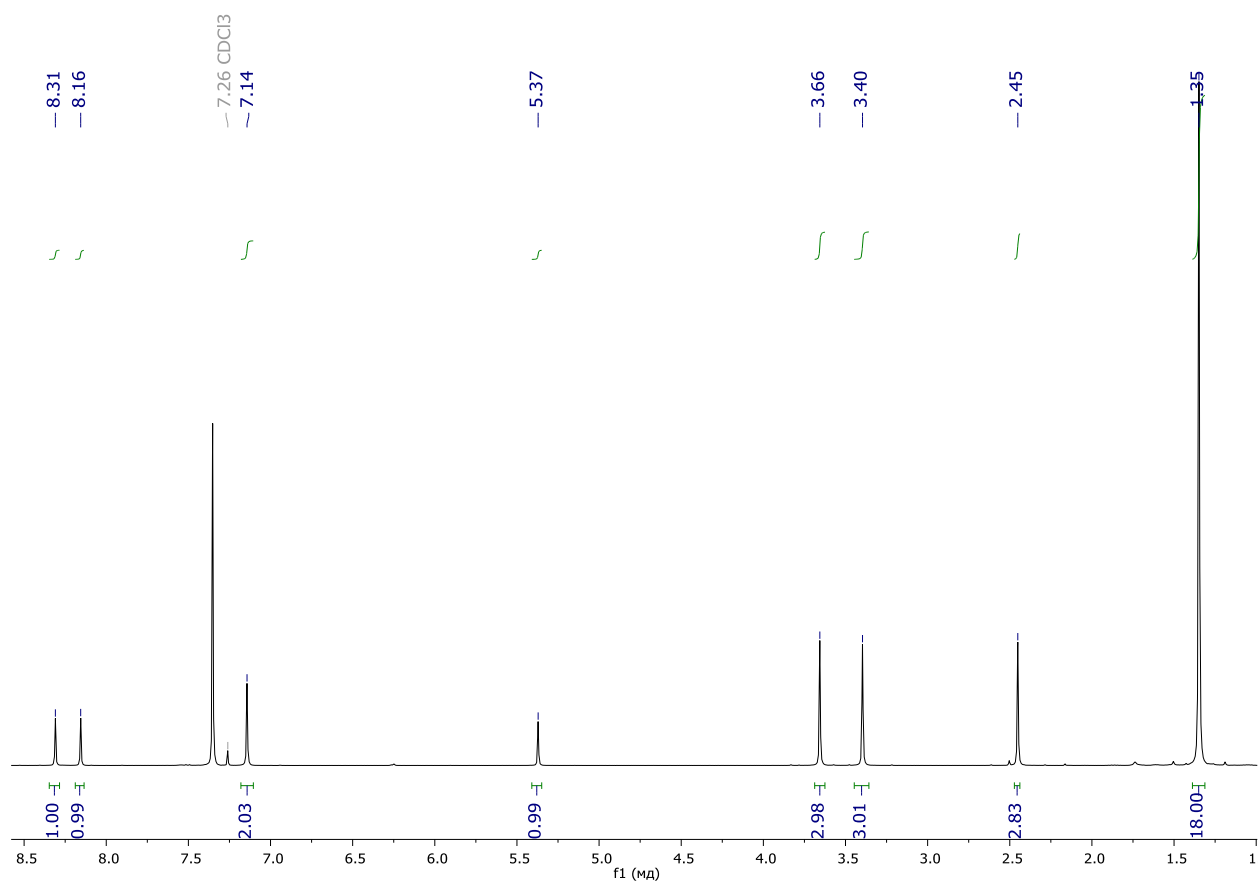

**Figure S26.** <sup>1</sup>H NMR (400 MHz) spectrum of **10** in CDCl<sub>3</sub>.

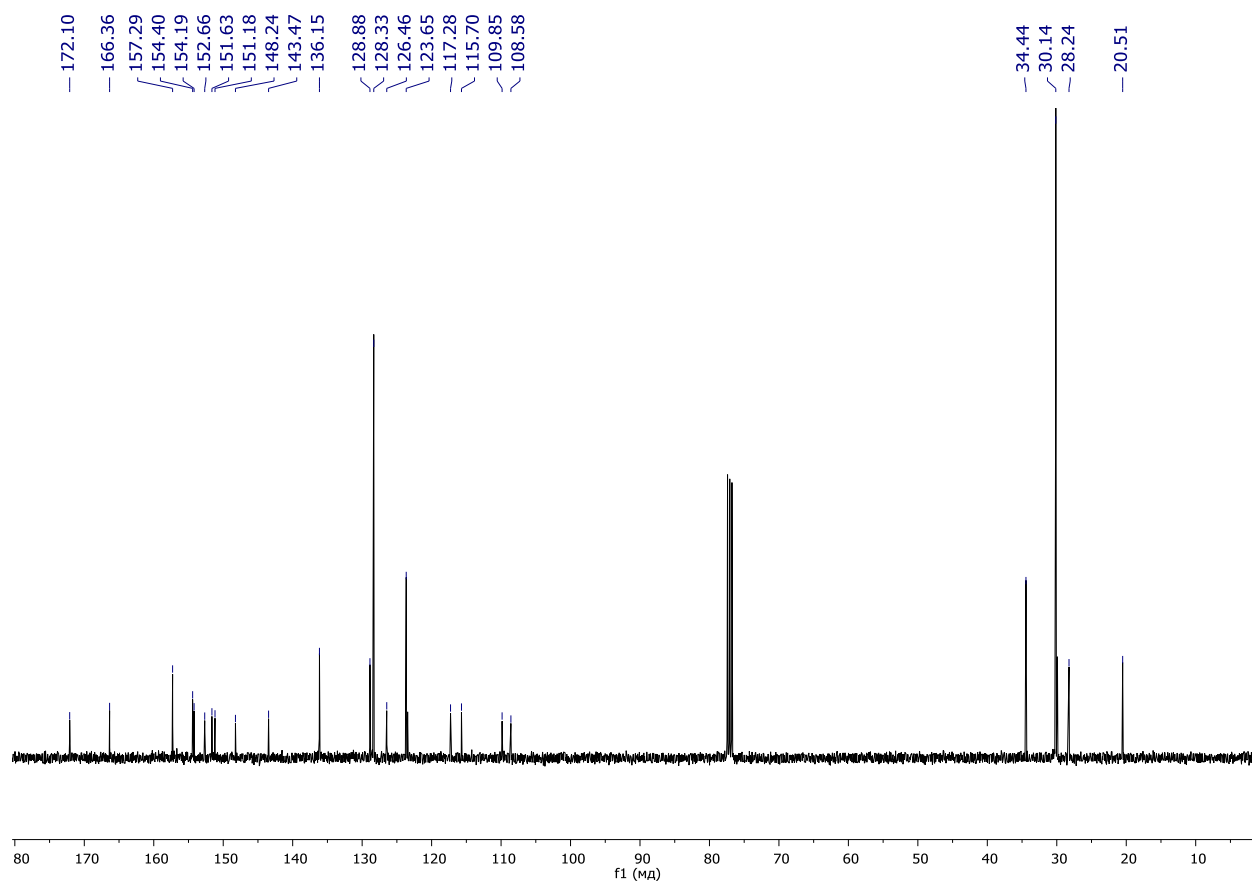

**Figure S27.**  $^{13}\text{C}$  NMR (101 MHz) spectrum of **10** in  $\text{CDCl}_3$

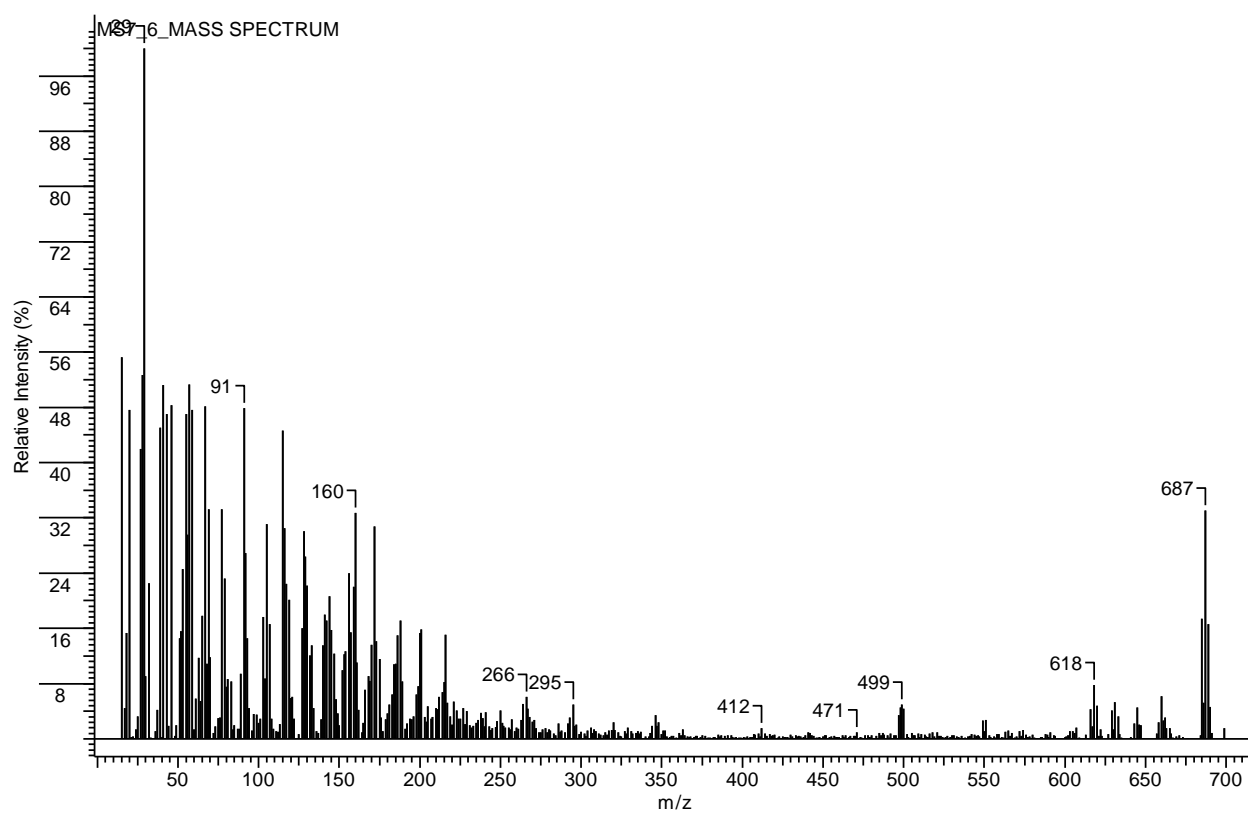

**Figure S28.** ESI-MS spectrum of **10**.

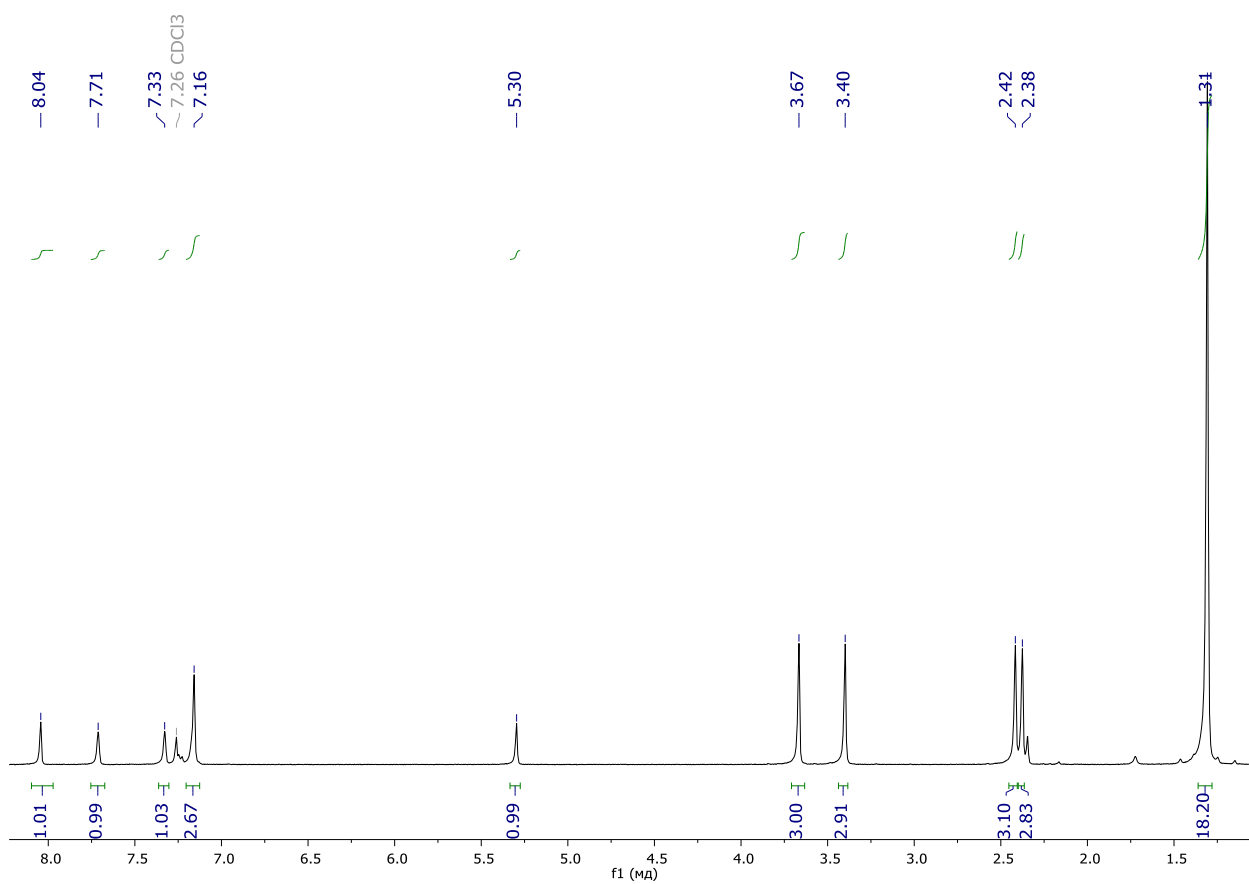

**Figure S29.** <sup>1</sup>H NMR (400 MHz) spectrum of **11** in CDCl<sub>3</sub>.

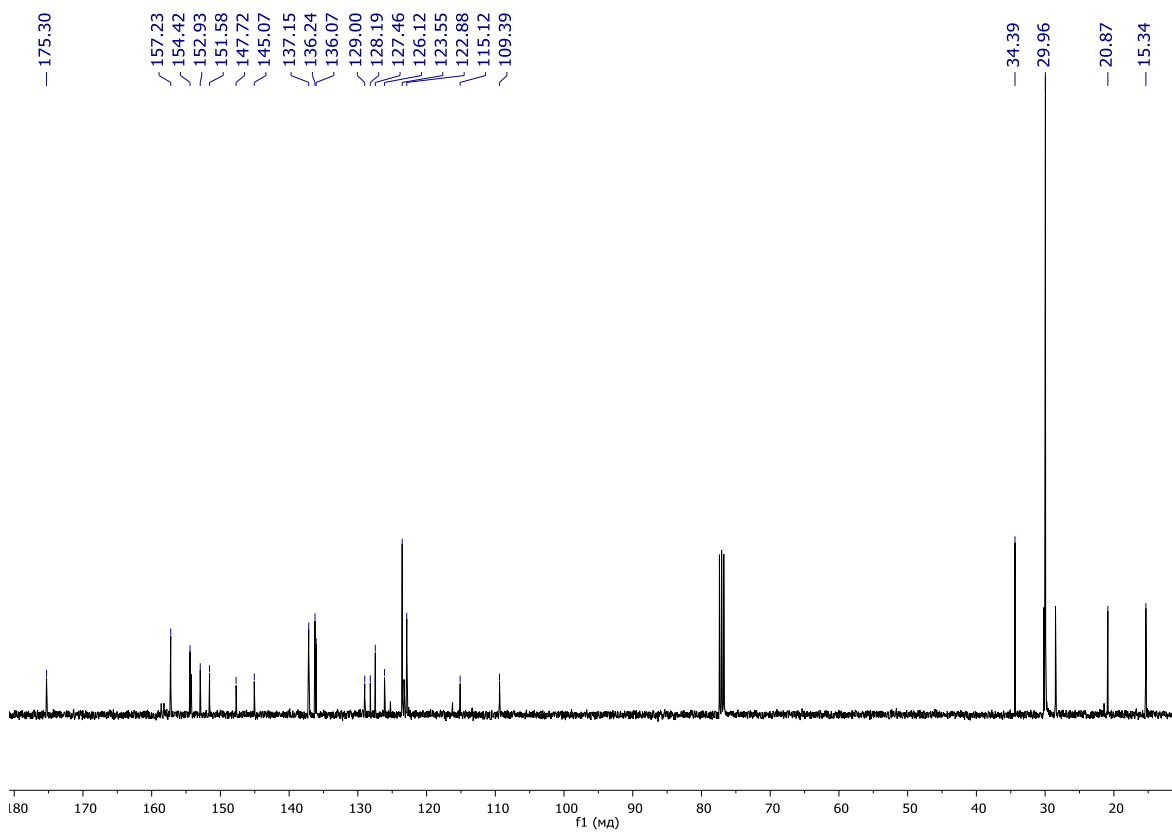

**Figure S30.** <sup>13</sup>C NMR (101 MHz) spectrum of **11** in CDCl<sub>3</sub>.



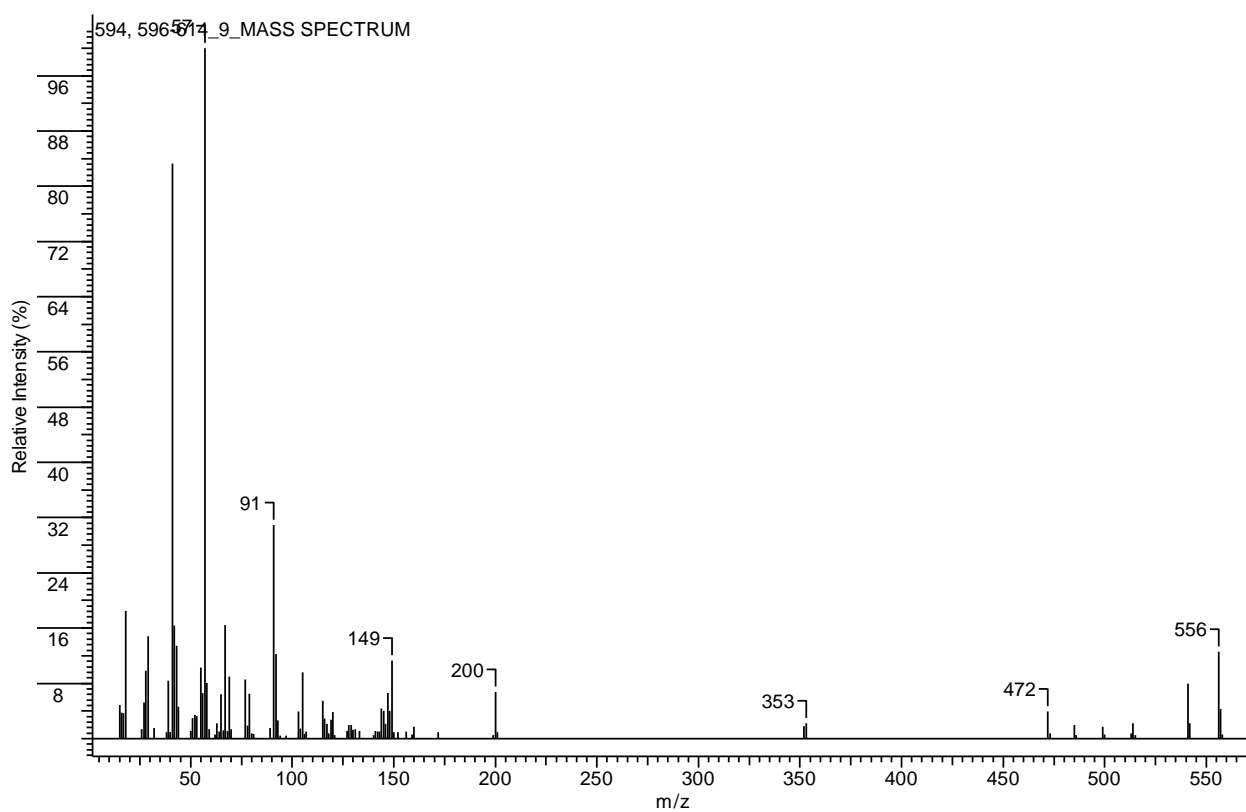

**Figure S31.** ESI-MS spectrum of **11**.

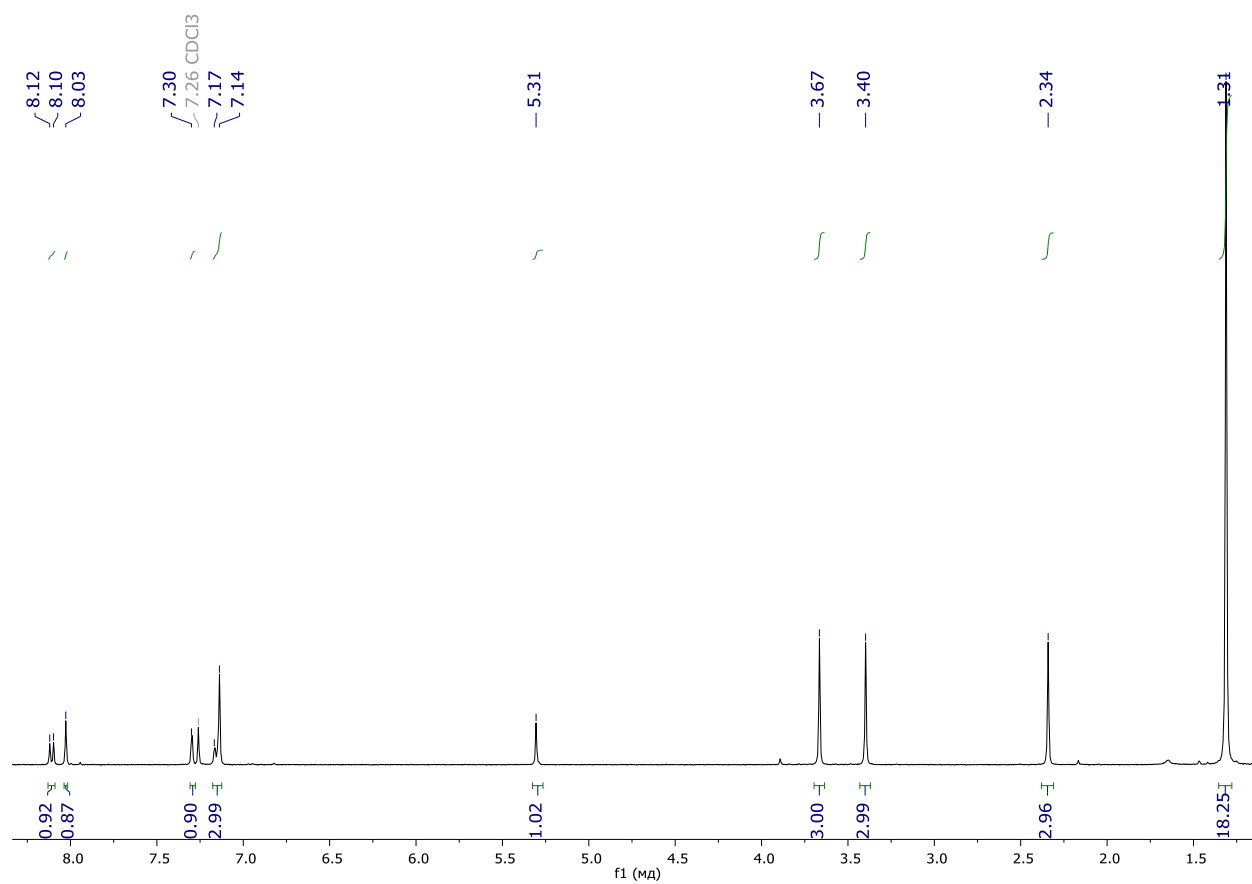

**Figure S32.** <sup>1</sup>H NMR (400 MHz) spectrum of **12** in CDCl<sub>3</sub>.

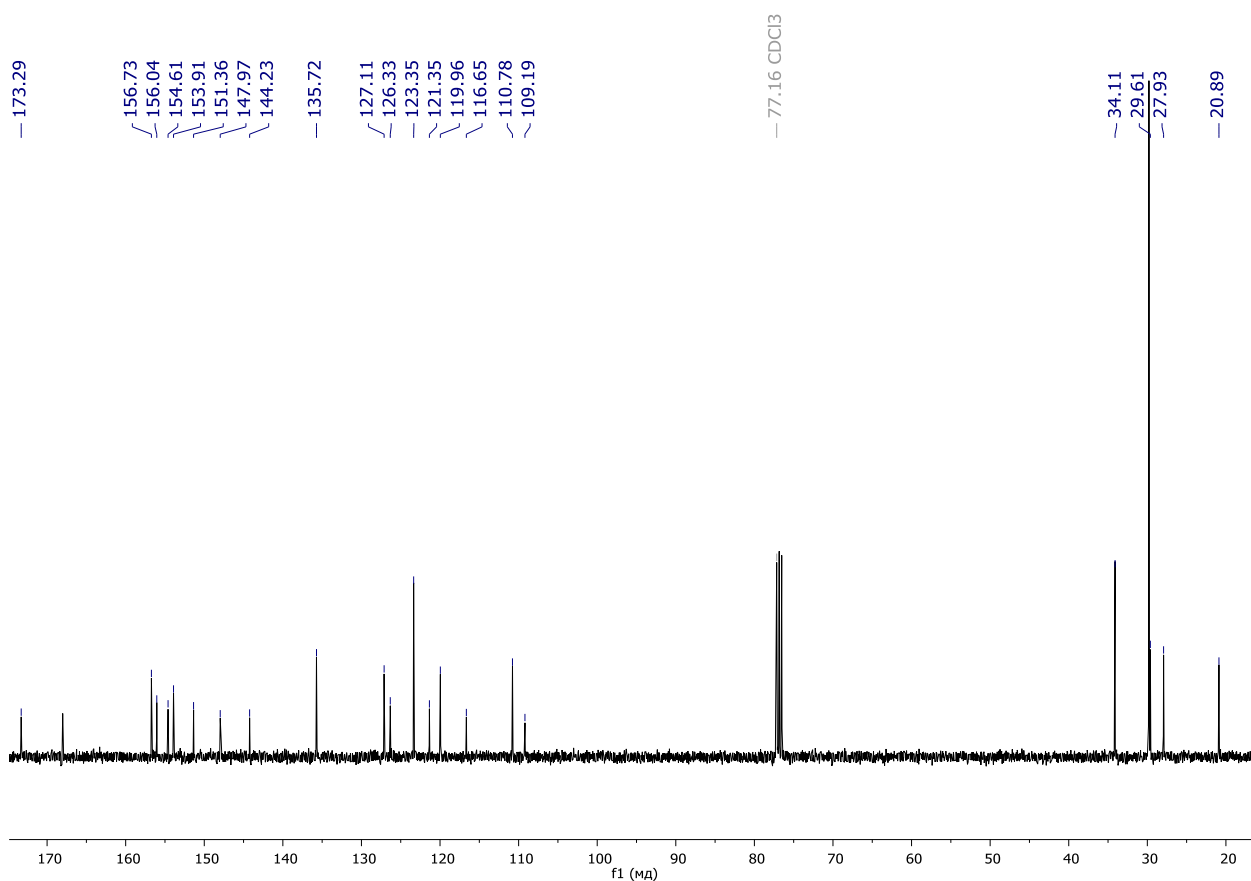

**Figure S33.** <sup>13</sup>C NMR (101 MHz) spectrum of **12** in CDCl<sub>3</sub>

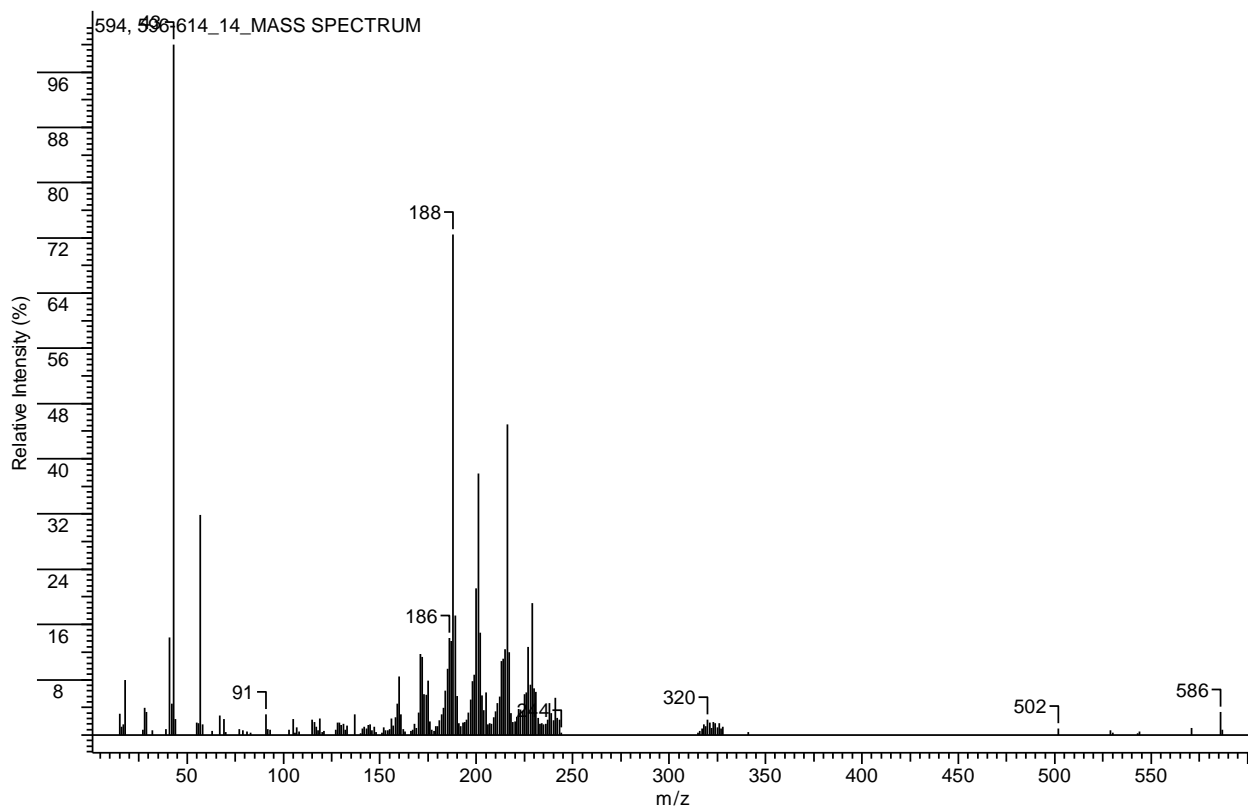

**Figure S34.** ESI-MS spectrum of **12**.

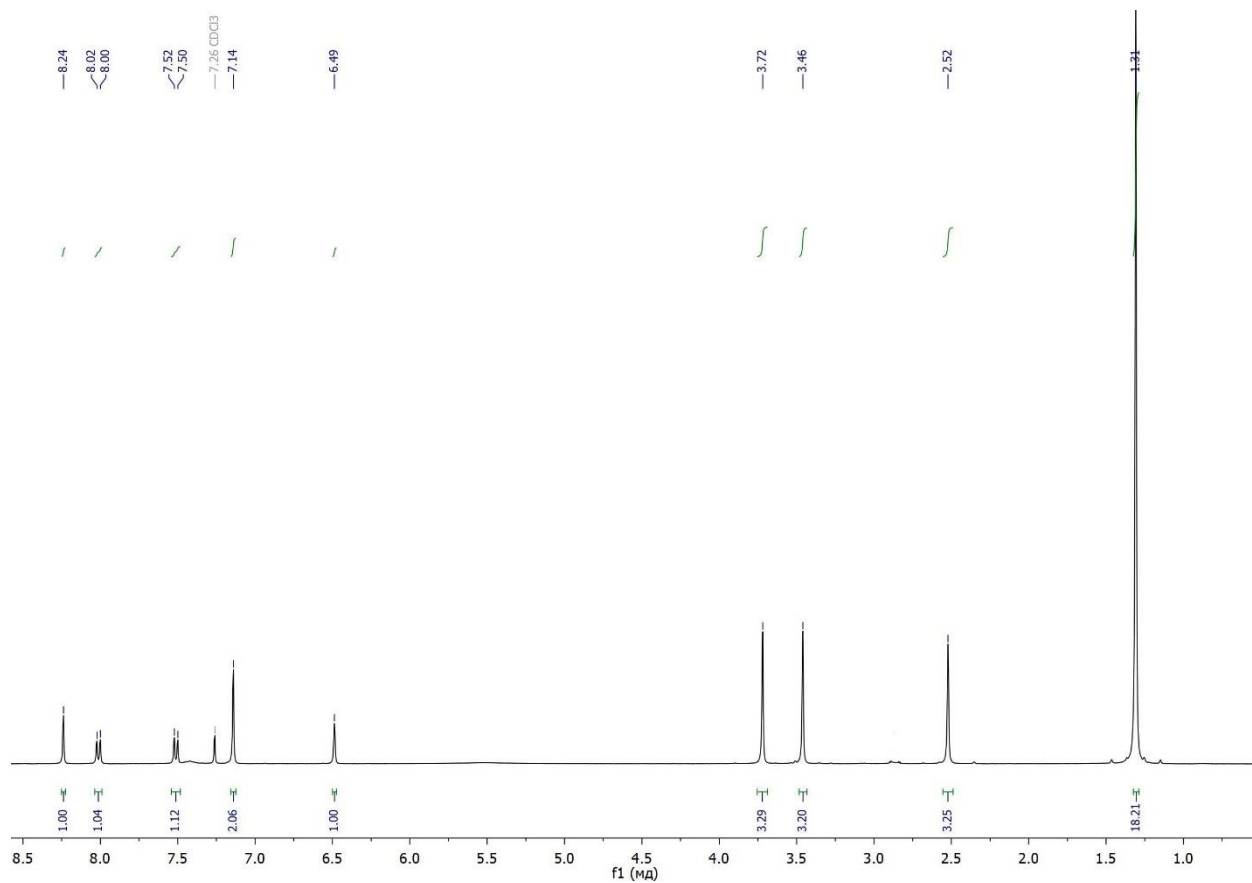

**Figure S35.** <sup>1</sup>H NMR (400 MHz) spectrum of **13** in CDCl<sub>3</sub>.

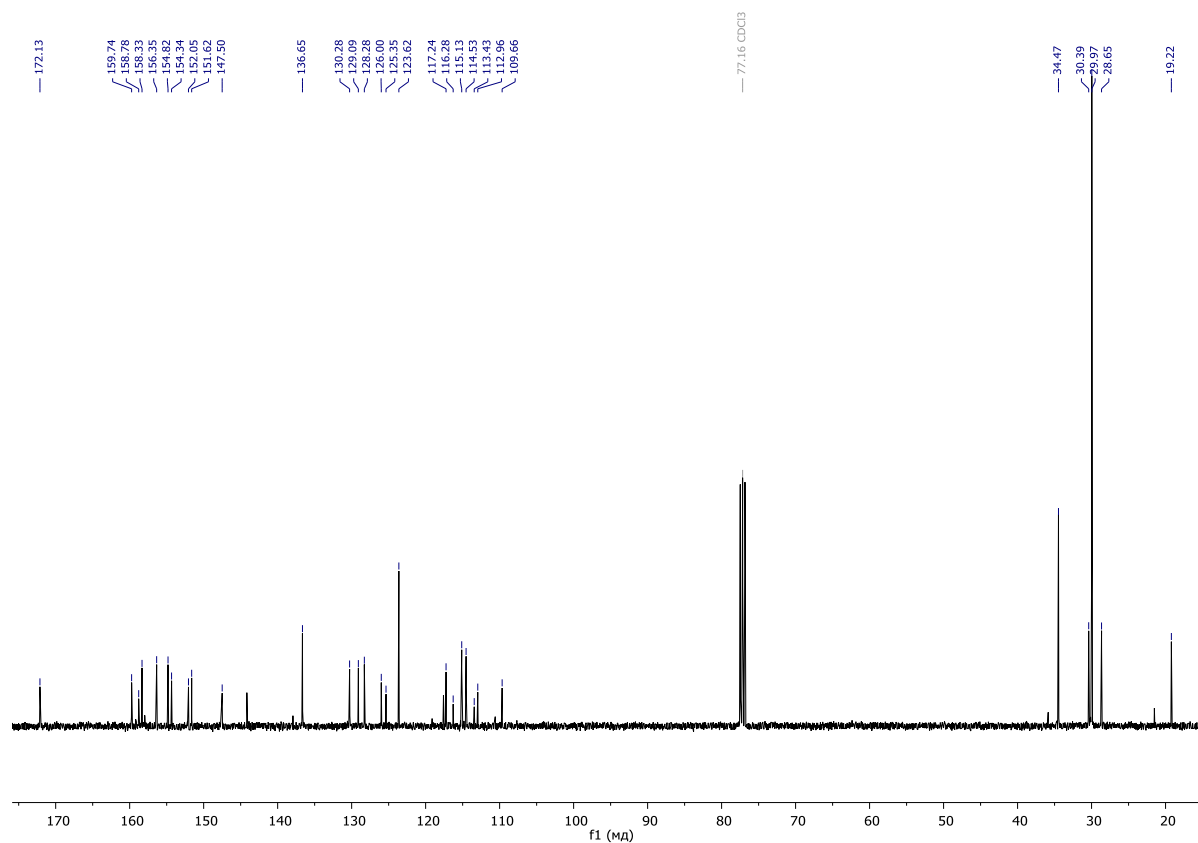

**Figure S36.** <sup>13</sup>C NMR (101 MHz) spectrum of **13** in CDCl<sub>3</sub>.

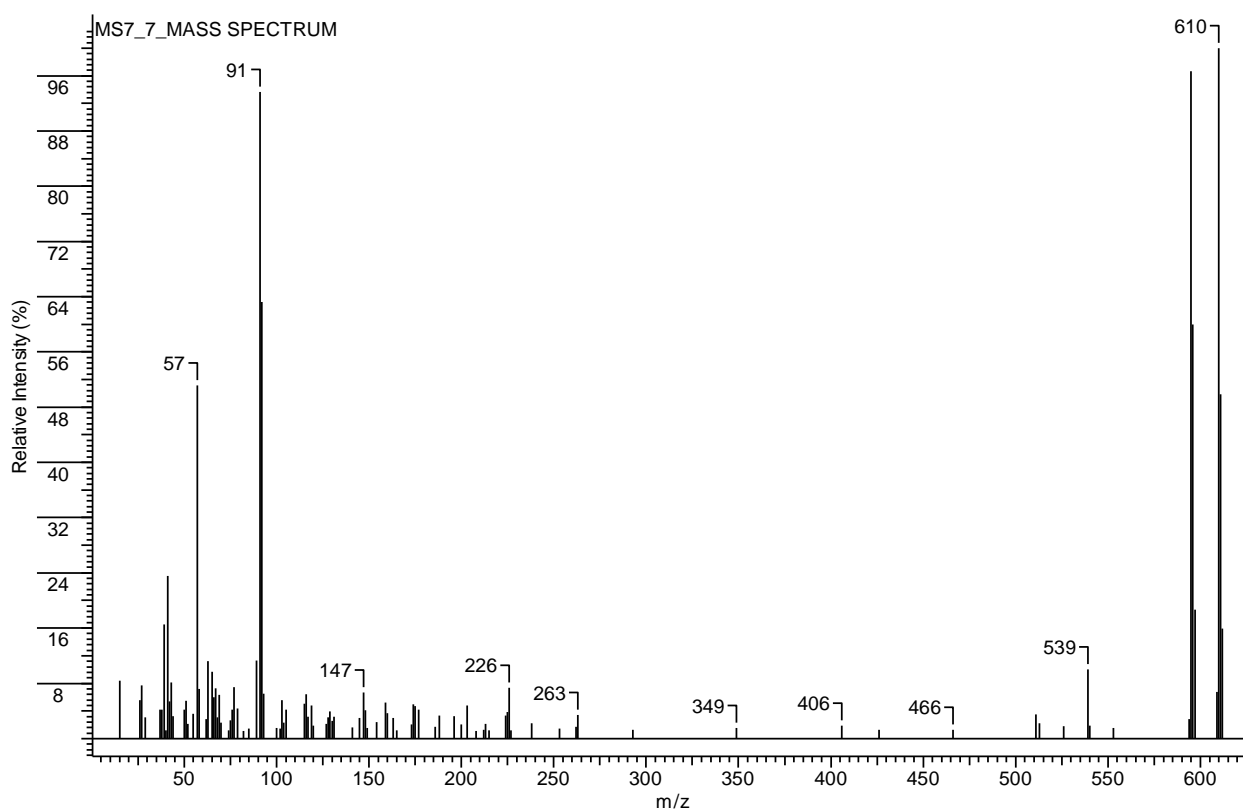

**Figure S37.** ESI-MS spectrum of **13**.

**Table S1.** Crystal data and structure refinement parameters for **2**.

| <b>2</b>                                     |                             |
|----------------------------------------------|-----------------------------|
| Formula unit                                 | $C_{30}H_{32.5}N_4O_{5.25}$ |
| Formula weight                               | 533.10                      |
| Crystal system                               | Monoclinic                  |
| Space group                                  | $P2_1/c$                    |
| Z                                            | 4                           |
| a, Å                                         | 9.7391(8)                   |
| b, Å                                         | 25.2387(19)                 |
| c, Å                                         | 11.2459(9)                  |
| $\beta$ , °                                  | 93.420(2)                   |
| V, Å <sup>3</sup>                            | 2759.3(4)                   |
| D <sub>calc</sub> (g cm <sup>-3</sup> )      | 1.283                       |
| Linear absorption, $\mu$ (cm <sup>-1</sup> ) | 0.89                        |
| F(000)                                       | 1130                        |
| 2 $\theta$ <sub>max</sub> , °                | 60                          |
| Reflections measured                         | 31316                       |
| Independent reflections                      | 8343                        |
| Observed reflections [ $I > 2\sigma(I)$ ]    | 4584                        |

|                                                            |              |
|------------------------------------------------------------|--------------|
| Parameters                                                 | 403          |
| R1                                                         | 0.0647       |
| wR2                                                        | 0.1593       |
| GOF                                                        | 1.016        |
| $\Delta\rho_{\max}/\Delta\rho_{\min}$ (e Å <sup>-3</sup> ) | 0.301/-0.368 |

---

**Table S2.** Bond lengths for **2**.

| Atom | Atom | Length/Å | Atom | Atom | Length/Å |
|------|------|----------|------|------|----------|
| O5   | C20  | 1.371(2) | C19  | C18  | 1.397(3) |
| O2   | C4   | 1.229(2) | C19  | C23  | 1.544(3) |
| O1   | C3   | 1.226(2) | C4   | C5   | 1.416(3) |
| N3   | C2   | 1.379(2) | C27  | C29  | 1.546(3) |
| N3   | C3   | 1.373(3) | C27  | C30  | 1.534(3) |
| N3   | C6   | 1.465(3) | C27  | C28  | 1.542(3) |
| N1   | C17  | 1.448(2) | C1   | C8   | 1.478(4) |
| N1   | C5   | 1.394(3) | C23  | C25  | 1.539(3) |
| N1   | C1   | 1.354(3) | C23  | C26  | 1.544(3) |
| N2   | C2   | 1.358(3) | C23  | C24  | 1.540(3) |
| N2   | C1   | 1.343(2) | C15  | C10  | 1.394(4) |
| O4   | C16  | 1.226(3) | C15  | C16  | 1.473(4) |
| N4   | C3   | 1.401(3) | C15  | C14  | 1.392(4) |
| N4   | C4   | 1.415(3) | C9   | C8   | 1.344(4) |
| N4   | C7   | 1.470(3) | C9   | O3   | 1.342(4) |
| C21  | C20  | 1.411(3) | C8   | C16  | 1.463(4) |
| C21  | C22  | 1.398(3) | C10  | C11  | 1.401(4) |
| C21  | C27  | 1.542(3) | C10  | O3   | 1.379(3) |
| C20  | C19  | 1.413(3) | C11  | C12  | 1.385(5) |
| C17  | C22  | 1.373(3) | C14  | C13  | 1.373(4) |
| C17  | C18  | 1.377(3) | C12  | C13  | 1.385(5) |
| C2   | C5   | 1.372(3) |      |      |          |

**Table S3.** Bond Angles for **2**.

| Atom | Atom | Atom | Angle/°    | Atom | Atom | Atom | Angle/°    |
|------|------|------|------------|------|------|------|------------|
| C2   | N3   | C6   | 121.12(18) | C2   | C5   | C4   | 123.46(18) |
| C3   | N3   | C2   | 119.68(16) | C21  | C27  | C29  | 109.32(17) |
| C3   | N3   | C6   | 119.13(17) | C30  | C27  | C21  | 111.47(17) |
| C5   | N1   | C17  | 128.65(17) | C30  | C27  | C29  | 110.92(16) |
| C1   | N1   | C17  | 125.07(17) | C30  | C27  | C28  | 106.38(18) |
| C1   | N1   | C5   | 106.17(16) | C28  | C27  | C21  | 110.97(16) |
| C1   | N2   | C2   | 103.19(16) | C28  | C27  | C29  | 107.70(18) |
| C3   | N4   | C4   | 126.62(18) | N1   | C1   | C8   | 121.50(18) |
| C3   | N4   | C7   | 116.32(17) | N2   | C1   | N1   | 113.22(18) |
| C4   | N4   | C7   | 117.01(17) | N2   | C1   | C8   | 125.28(19) |
| C20  | C21  | C27  | 122.63(16) | C25  | C23  | C19  | 110.31(18) |

|     |     |     |            |     |     |     |            |
|-----|-----|-----|------------|-----|-----|-----|------------|
| C22 | C21 | C20 | 117.29(18) | C25 | C23 | C26 | 111.03(17) |
| C22 | C21 | C27 | 120.07(18) | C25 | C23 | C24 | 106.17(19) |
| O5  | C20 | C21 | 115.13(17) | C26 | C23 | C19 | 111.26(18) |
| O5  | C20 | C19 | 122.19(18) | C24 | C23 | C19 | 111.22(17) |
| C21 | C20 | C19 | 122.67(17) | C24 | C23 | C26 | 106.7(2)   |
| C22 | C17 | N1  | 119.33(18) | C10 | C15 | C16 | 119.4(3)   |
| C22 | C17 | C18 | 121.72(17) | C14 | C15 | C10 | 118.9(3)   |
| C18 | C17 | N1  | 118.88(17) | C14 | C15 | C16 | 121.6(3)   |
| C17 | C22 | C21 | 120.53(19) | O3  | C9  | C8  | 125.1(3)   |
| N2  | C2  | N3  | 125.66(17) | C9  | C8  | C1  | 121.0(3)   |
| N2  | C2  | C5  | 112.80(17) | C9  | C8  | C16 | 120.7(3)   |
| C5  | C2  | N3  | 121.53(19) | C16 | C8  | C1  | 118.2(2)   |
| C20 | C19 | C23 | 123.34(17) | C15 | C10 | C11 | 121.4(3)   |
| C18 | C19 | C20 | 116.91(18) | O3  | C10 | C15 | 122.8(3)   |
| C18 | C19 | C23 | 119.74(18) | O3  | C10 | C11 | 115.9(4)   |
| C17 | C18 | C19 | 120.83(18) | O4  | C16 | C15 | 123.4(3)   |
| O1  | C3  | N3  | 121.97(19) | O4  | C16 | C8  | 122.5(3)   |
| O1  | C3  | N4  | 120.8(2)   | C8  | C16 | C15 | 114.1(3)   |
| N3  | C3  | N4  | 117.18(17) | C12 | C11 | C10 | 118.4(3)   |
| O2  | C4  | N4  | 120.64(19) | C13 | C14 | C15 | 119.7(3)   |
| O2  | C4  | C5  | 127.89(19) | C11 | C12 | C13 | 120.1(3)   |
| N4  | C4  | C5  | 111.46(17) | C14 | C13 | C12 | 121.5(3)   |
| N1  | C5  | C4  | 131.92(17) | C9  | O3  | C10 | 117.8(2)   |
| C2  | C5  | N1  | 104.62(17) |     |     |     |            |

**Table S4.** Comparison of selected bond distances (Å) of compound **2** determined theoretically (from DFT calculation) and experimentally (from crystal structure).

| Bond    | B3LYP   | EXPT     | Bond    | B3LYP   | EXPT     |
|---------|---------|----------|---------|---------|----------|
| O5-C20  | 1.37013 | 1.371(2) | C19-C18 | 1.39443 | 1.397(3) |
| O2-C4   | 1.22434 | 1.229(2) | C19-C23 | 1.54936 | 1.544(3) |
| O1-C3   | 1.22244 | 1.226(2) | C4-C5   | 1.43293 | 1.416(3) |
| N3-C2   | 1.37238 | 1.379(2) | C27-C29 | 1.54830 | 1.546(3) |
| N3-C3   | 1.38695 | 1.373(3) | C27-C30 | 1.54825 | 1.534(3) |
| N3-C6   | 1.46497 | 1.465(3) | C27-C28 | 1.54830 | 1.542(3) |
| N1-C17  | 1.43914 | 1.448(2) | C1-C8   | 1.47017 | 1.478(4) |
| N1-C5   | 1.39422 | 1.394(3) | C23-C25 | 1.55139 | 1.539(3) |
| N1-C1   | 1.36671 | 1.354(3) | C23-C26 | 1.55155 | 1.544(3) |
| N2-C2   | 1.35314 | 1.358(3) | C23-C24 | 1.54311 | 1.540(3) |
| N2-C1   | 1.33593 | 1.343(2) | C15-C10 | 1.39915 | 1.394(4) |
| O4-C16  | 1.22754 | 1.226(3) | C15-C16 | 1.47675 | 1.473(4) |
| N4-C3   | 1.40223 | 1.401(3) | C15-C14 | 1.40494 | 1.392(4) |
| N4-C4   | 1.42046 | 1.415(3) | C9-C8   | 1.35543 | 1.344(4) |
| N4-C7   | 1.46893 | 1.470(3) | C9-O3   | 1.33847 | 1.342(4) |
| C21-C20 | 1.41494 | 1.411(3) | C8-C16  | 1.46974 | 1.463(4) |
| C21-C22 | 1.39609 | 1.398(3) | C10-C11 | 1.39476 | 1.401(4) |
| C21-C27 | 1.54678 | 1.542(3) | C10-O3  | 1.37392 | 1.379(3) |
| C20-C19 | 1.41768 | 1.413(3) | C11-C12 | 1.38558 | 1.385(5) |
| C17-C22 | 1.38754 | 1.373(3) | C14-C13 | 1.38324 | 1.373(4) |
| C17-C18 | 1.38535 | 1.377(3) | C12-C13 | 1.40391 | 1.385(5) |
| C2-C5   | 1.37909 | 1.372(3) |         |         |          |

**Table S5.** Comparison of selected angles (°) of compound **2** determined theoretically (from DFT calculation) and experimentally (from crystal structure).

| Bond        | B3LYP   | EXPT       | Bond        | B3LYP   | EXPT       |
|-------------|---------|------------|-------------|---------|------------|
| C2-N3-C6    | 120.240 | 121.12(18) | C2-C5-C4    | 122.554 | 123.46(18) |
| C3-N3-C2    | 119.529 | 119.68(16) | C21-C27-C29 | 110.382 | 109.32(17) |
| C3-N3-C6    | 120.226 | 119.13(17) | C30-C27-C21 | 110.315 | 111.47(17) |
| C5-N1-C17   | 126.780 | 128.65(17) | C30-C27-C29 | 110.206 | 110.92(16) |
| C1-N1-C17   | 127.010 | 125.07(17) | C30-C27-C28 | 107.081 | 106.38(18) |
| C1-N1-C5    | 105.924 | 106.17(16) | C28-C27-C21 | 111.708 | 110.97(16) |
| C1-N2-C2    | 104.598 | 103.19(16) | C28-C27-C29 | 107.049 | 107.70(18) |
| C3-N4-C4    | 127.238 | 126.62(18) | N1-C1-C8    | 124.642 | 121.50(18) |
| C3-N4-C7    | 115.021 | 116.32(17) | N2-C1-N1    | 112.529 | 113.22(18) |
| C4-N4-C7    | 117.741 | 117.01(17) | N2-C1-C8    | 122.823 | 125.28(19) |
| C20-C21-C27 | 122.236 | 122.63(16) | C25-C23-C19 | 110.568 | 110.31(18) |
| C22-C21-C20 | 117.098 | 117.29(18) | C25-C23-C26 | 111.219 | 111.03(17) |
| C22-C21-C27 | 120.664 | 120.07(18) | C25-C23-C24 | 106.148 | 106.17(19) |
| O5-C20-C21  | 115.835 | 115.13(17) | C26-C23-C19 | 110.850 | 111.26(18) |
| O5-C20-C19  | 121.482 | 122.19(18) | C24-C23-C19 | 111.673 | 111.22(17) |
| C21-C20-C19 | 122.683 | 122.67(17) | C24-C23-C26 | 106.218 | 106.7(2)   |
| C22-C17-N1  | 119.376 | 119.33(18) | C10-C15-C16 | 120.463 | 119.4(3)   |
| C22-C17-C18 | 120.762 | 121.72(17) | C14-C15-C10 | 118.200 | 118.9(3)   |
| C18-C17-N1  | 119.860 | 118.88(17) | C14-C15-C16 | 121.331 | 121.6(3)   |
| C17-C22-C21 | 121.142 | 120.53(19) | O3-C9-C8    | 124.978 | 125.1(3)   |
| N2-C2-N3    | 125.565 | 125.66(17) | C9-C8-C1    | 118.059 | 121.0(3)   |
| N2-C2-C5    | 111.886 | 112.80(17) | C9-C8-C16   | 119.996 | 120.7(3)   |
| C5-C2-N3    | 122.549 | 121.53(19) | C16-C8-C1   | 121.672 | 118.2(2)   |
| C20-C19-C23 | 122.669 | 123.34(17) | C15-C10-C11 | 121.971 | 121.4(3)   |
| C18-C19-C20 | 117.132 | 116.91(18) | O3-C10-C15  | 121.312 | 122.8(3)   |
| C18-C19-C23 | 120.199 | 119.74(18) | O3-C10-C11  | 116.717 | 115.9(4)   |
| C17-C18-C19 | 121.174 | 120.83(18) | O4-C16-C15  | 122.680 | 123.4(3)   |
| O1-C3-N3    | 122.368 | 121.97(19) | O4-C16-C8   | 123.373 | 122.5(3)   |
| O1-C3-N4    | 120.831 | 120.8(2)   | C8-C16-C15  | 113.932 | 114.1(3)   |
| N3-C3-N4    | 116.802 | 117.18(17) | C12-C11-C10 | 118.630 | 118.4(3)   |
| O2-C4-N4    | 121.423 | 120.64(19) | C13-C14-C15 | 120.538 | 119.7(3)   |
| O2-C4-C5    | 127.264 | 127.89(19) | C11-C12-C13 | 120.634 | 120.1(3)   |
| N4-C4-C5    | 111.313 | 111.46(17) | C14-C13-C12 | 120.027 | 121.5(3)   |
| N1-C5-C4    | 132.355 | 131.92(17) | C9-O3-C10   | 119.172 | 117.8(2)   |
| C2-C5-N1    | 105.061 | 104.62(17) |             |         |            |

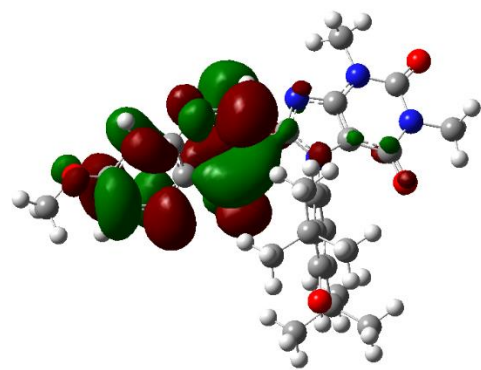

LUMO of 3

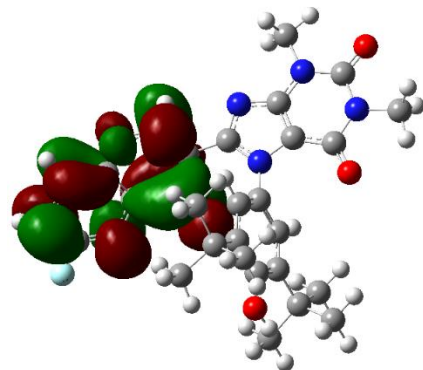

LUMO of 4

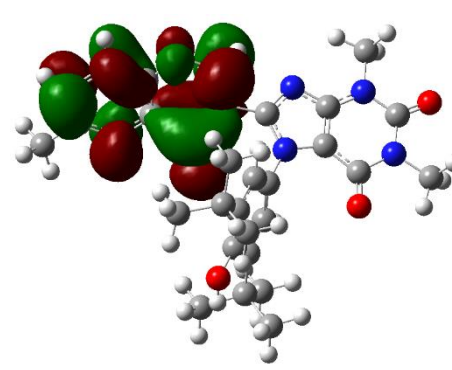

LUMO of 5

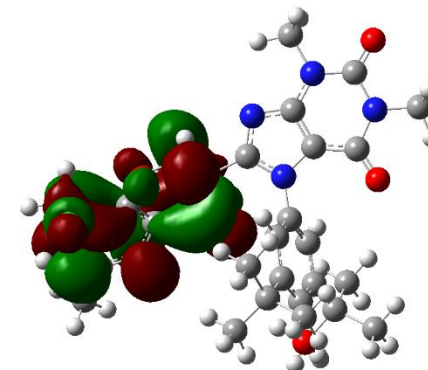

LUMO of 6

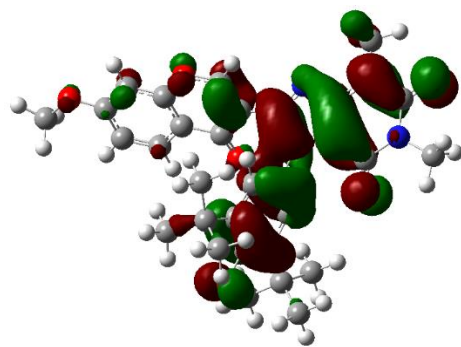

HOMO of 3

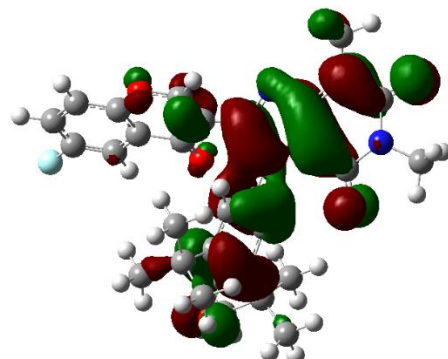

HOMO of 4

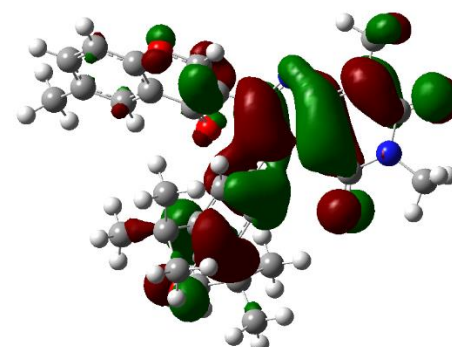

HOMO of 5

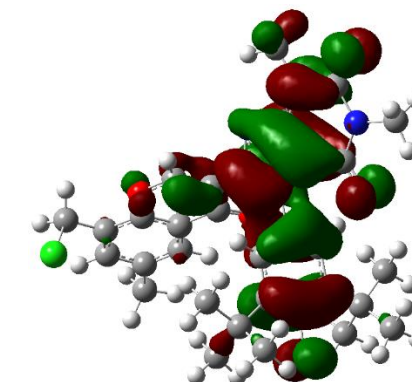

HOMO of 6

**Figure S38.** Visualization of HOMO/LUMO for compounds 3-6



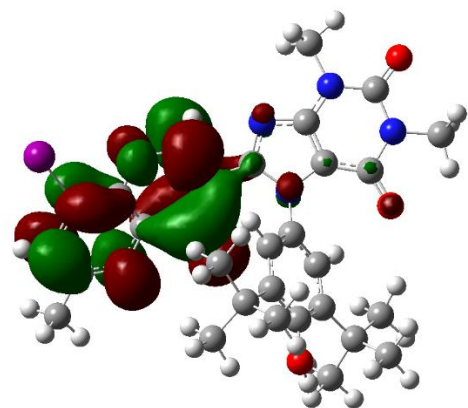

LUMO of 7

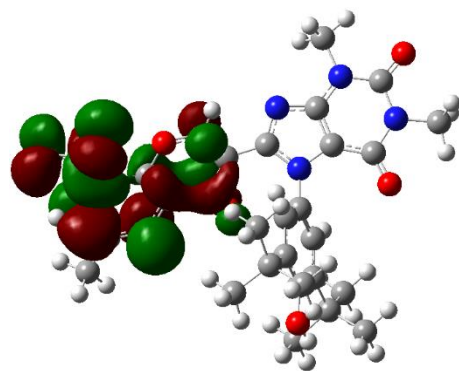

LUMO of 8

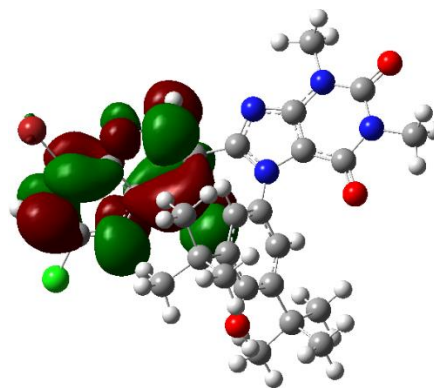

LUMO of 9

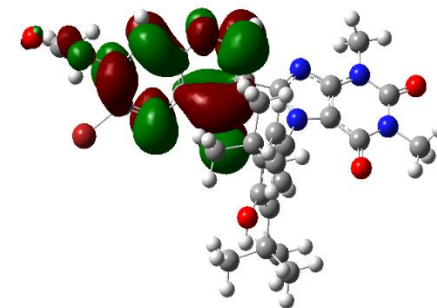

LUMO of 10

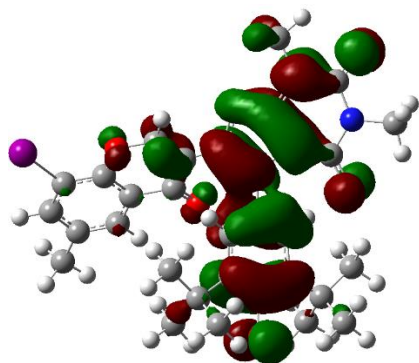

HOMO of 7

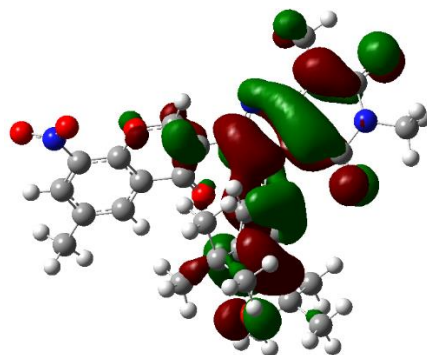

HOMO of 8

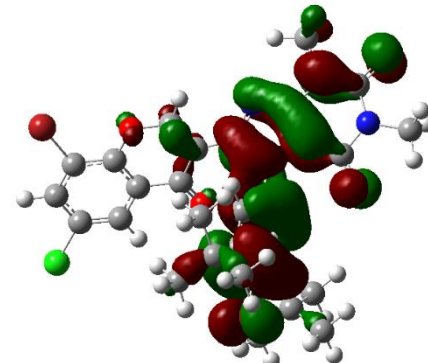

HOMO of 9

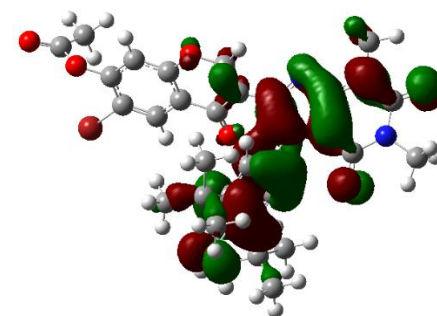

HOMO of 10

**Figure S39.** Visualization of HOMO/LUMO for compounds 7-10

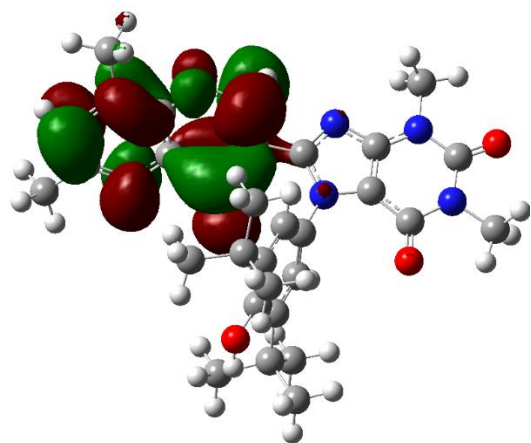

LUMO of 11

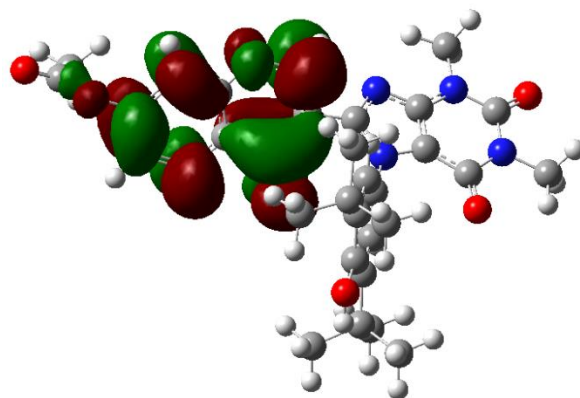

LUMO of 12

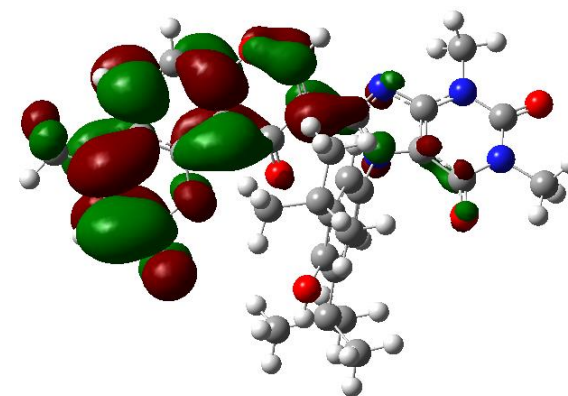

LUMO of 13

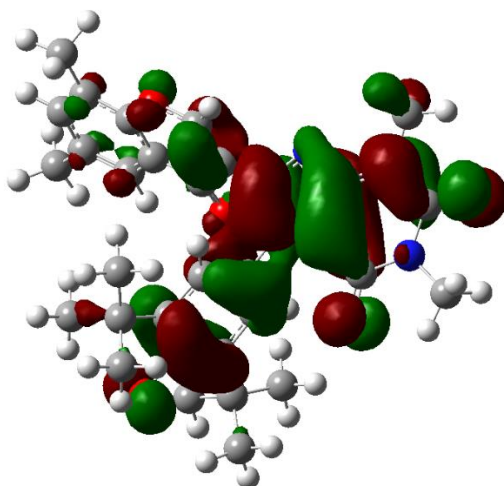

HOMO of 11

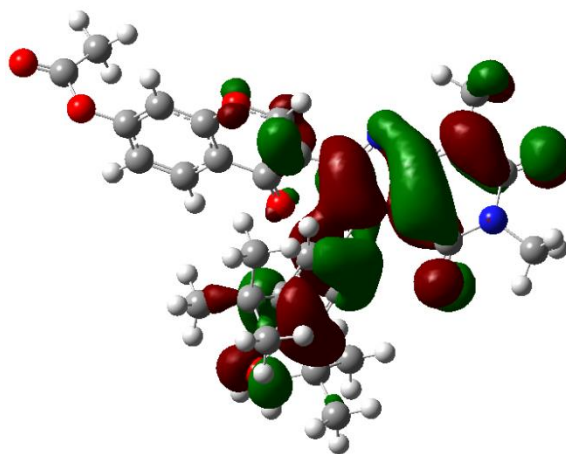

HOMO of 12

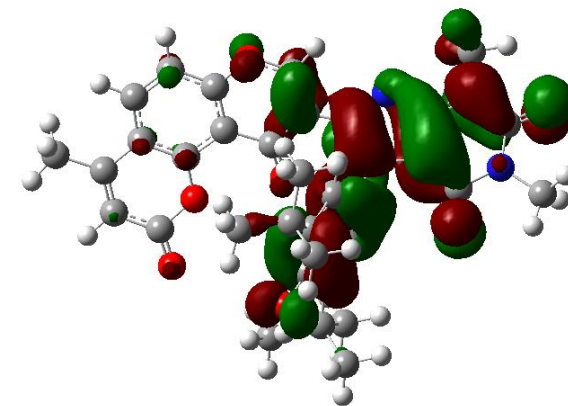

HOMO of 13

**Figure S40.** Visualization of HOMO/LUMO for compounds **11-13**

**Table S6.** Calculated molecular descriptors for compounds **2-7**

|                                            | <b>2</b> | <b>3</b> | <b>4</b> | <b>5</b> | <b>6</b> | <b>7</b> |
|--------------------------------------------|----------|----------|----------|----------|----------|----------|
| $E_{\text{HOMO}}$ (eV)                     | -6,1097  | -6,08773 | -6,11903 | -6,09127 | -6,11495 | -5,87385 |
| $E_{\text{LUMO}}$ (eV)                     | -2,04929 | -1,95514 | -2,18181 | -2,00494 | -2,17446 | -1,97228 |
| Energy gap (eV)                            | 4,060485 | 4,132595 | 3,937217 | 4,086336 | 3,940483 | 3,901571 |
| Ionization potential, IP (eV)              | 6,109776 | 6,087734 | 6,119028 | 6,091272 | 6,114946 | 5,873853 |
| Electron affinity (eV)                     | 2,049291 | 1,955139 | 2,18181  | 2,004936 | 2,174463 | 1,972282 |
| Electronegativity, $\chi$ (eV)             | 4,079533 | 4,021437 | 4,150419 | 4,048104 | 4,144704 | 3,923068 |
| Chemical hardness, $\eta$ (eV)             | 2,030243 | 2,066298 | 1,968609 | 2,043168 | 1,970241 | 1,950785 |
| Chemical softness, $S$ (eV <sup>-1</sup> ) | 0,492552 | 0,483957 | 0,507973 | 0,489436 | 0,507552 | 0,512614 |
| Electrophilicity index, $\omega$ (eV)      | 4,09867  | 3,913268 | 4,375165 | 4,01023  | 4,35951  | 3,944683 |
| Chemical potential, $\mu$ (eV)             | -4,07953 | -4,02144 | -4,15042 | -4,0481  | -4,1447  | -3,92307 |

**Table S7.** Calculated molecular descriptors for compounds **8-13**

|                                            | <b>8</b> | <b>9</b> | <b>10</b> | <b>11</b> | <b>12</b> | <b>13</b> |
|--------------------------------------------|----------|----------|-----------|-----------|-----------|-----------|
| $E_{\text{HOMO}}$ (eV)                     | -6,14243 | -6,09182 | -6,09807  | -6,10978  | -6,11957  | -6,13454  |
| $E_{\text{LUMO}}$ (eV)                     | -2,95951 | -2,41447 | -2,35351  | -1,95051  | -2,16086  | -2,27705  |
| Energy gap (eV)                            | 3,182917 | 3,677349 | 3,744561  | 4,159262  | 3,958714  | 3,857488  |
| Ionization potential, IP (eV)              | 6,142429 | 6,091816 | 6,098075  | 6,109776  | 6,119572  | 6,134538  |
| Electron affinity (eV)                     | 2,959512 | 2,414468 | 2,353514  | 1,950513  | 2,160857  | 2,27705   |
| Electronegativity, $\chi$ (eV)             | 4,550971 | 4,253142 | 4,225794  | 4,030144  | 4,140215  | 4,205794  |
| Chemical hardness, $\eta$ (eV)             | 1,591459 | 1,838674 | 1,87228   | 2,079631  | 1,979357  | 1,928744  |
| Chemical softness, $S$ (eV <sup>-1</sup> ) | 0,628354 | 0,54387  | 0,534108  | 0,480854  | 0,505215  | 0,518472  |
| Electrophilicity index, $\omega$ (eV)      | 6,507028 | 4,919092 | 4,768874  | 3,905035  | 4,330036  | 4,58555   |
| Chemical potential, $\mu$ (eV)             | -4,55097 | -4,25314 | -4,22579  | -4,03014  | -4,14021  | -4,20579  |

**Table S8.** The predicted types of biological activity for compounds **2-13**

| Type of biological activity | Compound |       |       |       |       |       |       |       |       |       |       |       |
|-----------------------------|----------|-------|-------|-------|-------|-------|-------|-------|-------|-------|-------|-------|
|                             | 2        | 3     | 4     | 5     | 6     | 7     | 8     | 9     | 10    | 11    | 12    | 13    |
| Lipid metabolism regulator  | 0,725    | 0.733 | 0,579 | 0,689 | 0.494 | 0,521 | 0.499 | 0,552 | 0.718 | 0,545 | 0,870 | 0.656 |
| Histidine kinase inhibitor  | 0,713    | 0.692 | 0,665 | 0,688 | 0.599 | 0,598 | 0.587 | 0,643 | 0.649 | 0,631 | 0,700 | 0.626 |
| Antiallergic                | 0,676    | 0.687 | 0,659 | 0,661 | 0.602 | 0,486 | 0.569 | 0,493 | 0.576 | 0,666 | 0,662 | 0.644 |
| Lipid peroxidase inhibitor  | 0,441    | 0.529 | 0,312 | 0,466 | 0.302 | 0,198 | 0.361 | 0,572 | 0.450 | 0,474 | 0,633 | 0.608 |
| Antiparkinsonian            | 0,433    | 0.390 | 0,426 | 0,404 | 0.348 | 0,219 | 0.264 | 0,362 | 0.255 | 0,365 | 0,352 | 0.287 |
| General pump inhibitor      | 0,420    | 0.435 | 0,366 | 0,401 | 0.315 | -     | -     | -     | -     | 0,372 | 0,364 | 0.533 |
| Antiinflammatory            | 0,372    | 0.384 | 0,396 | 0,382 | 0.343 | 0,240 | 0.269 | 0,357 | 0.401 | 0,450 | 0,487 | 0.494 |
| Diuretic                    | 0,331    | 0.277 | 0,226 | 0,313 | 0.277 | 0,277 | 0.300 | 0,305 | 0.334 | 0,285 | 0,331 | 0.275 |
| Immunomodulator             | 0,331    | 0.265 | 0,295 | 0,307 | 0.295 | 0.154 | 0.200 | 0,199 | 0.244 | 0,372 | 0,332 | 0.285 |
| Cardioprotectant            | 0,308    | 0.325 | 0,290 | 0,336 | -     | 0,298 | 0.244 | -     | -     | 0,330 | 0,264 | -     |
| Antioxidant                 | 0,233    | 0.263 | 0,194 | 0,230 | 0.198 | 0,168 | 0.185 | 0,169 | 0.235 | 0,266 | 0,276 | 0.258 |
| Spasmolytic                 | 0,231    | 0.236 | -     | 0,202 | -     | -     | -     | -     | -     | 0,190 | 0,207 | 0.259 |
| Vasodilator                 | 0,226    | 0.245 | -     | 0,196 | -     | -     | -     | -     | -     | 0,183 | 0,289 | -     |
| Cytostatic                  | 0,196    | 0.218 | -     | -     | -     | -     | -     | -     | -     | -     | 0,234 | -     |
| Lipoxygenase inhibitor      | 0,166    | 0.172 | 0,165 | 0,168 | 0.136 | 0,106 | 0.122 | 0,126 | 0.151 | 0,183 | 0,178 | 0.119 |
| MAO inhibitor               | 0,147    | 0.191 | 0,134 | 0,163 | -     | -     | -     | 0,109 |       | 0,132 | 0,124 | 0.185 |
| Cyclooxygenase inhibitor    | 0,139    | 0.156 | 0,230 | 0,165 | 0.099 | -     | -     | 0,112 | 0.154 | 0,212 | 0,196 | 0.167 |
| Antiischemic, cerebral      | -        | 0.337 | 0,385 | 0,360 | 0.362 | -     | -     | -     | -     | 0,343 | 0,420 | 0.319 |

**Table S9.** Drug-Likeness of compounds **2-13**

| Соединение | MW <sup>1</sup> | HBD <sup>2</sup> | HBA <sup>3</sup> | MR <sup>4</sup> | TPSA, Å <sup>2</sup> <sup>5</sup> | MLOGP <sup>6</sup> | Rotatable bonds | Bio-availability | Lipinski rule | Veber rule |
|------------|-----------------|------------------|------------------|-----------------|-----------------------------------|--------------------|-----------------|------------------|---------------|------------|
| <b>2</b>   | 528.6           | 1                | 6                | 154.15          | 112.26                            | 3.08               | 4               | 0.55             | +             | +          |
| <b>3</b>   | 558.62          | 1                | 7                | 160.65          | 121.49                            | 2.77               | 5               | 0.55             | +             | +          |
| <b>4</b>   | 546.59          | 1                | 7                | 154.11          | 112.26                            | 3.45               | 4               | 0.55             | +             | +          |
| <b>5</b>   | 542.63          | 1                | 6                | 159.12          | 112.62                            | 3.27               | 4               | 0.55             | +             | +          |
| <b>6</b>   | 591.10          | 1                | 6                | 168.88          | 112.26                            | 3.65               | 5               | 0.55             | +             | +          |
| <b>7</b>   | 668.52          | 1                | 6                | 171.84          | 112.26                            | 3.91               | 4               | 0.55             | +             | +          |
| <b>8</b>   | 587.62          | 1                | 8                | 167.94          | 158.08                            | 2.41               | 5               | 0.17             | +             | -          |
| <b>9</b>   | 641.94          | 1                | 6                | 166.87          | 112.26                            | 4.09               | 4               | 0.55             | +             | +          |
| <b>10</b>  | 665.53          | 1                | 8                | 173.35          | 138.56                            | 3.49               | 6               | 0.17             | -             | +          |
| <b>11</b>  | 556.65          | 1                | 6                | 164.09          | 112.26                            | 3.46               | 4               | 0.55             | +             | +          |
| <b>12</b>  | 586.63          | 1                | 8                | 165.65          | 138.56                            | 2.94               | 6               | 0.17             | -             | +          |
| <b>13</b>  | 610.66          | 1                | 8                | 175.16          | 142.47                            | 3.15               | 4               | 0.17             | +             | -          |

<sup>1</sup> Molecular weight g/mol

<sup>2</sup> Number of H-bond donors

<sup>3</sup> Number of H-bond acceptors

<sup>4</sup> Molar Refractivity

<sup>5</sup> Topological Polar Surface Area

<sup>6</sup> Log  $P_{\text{octanol/water}}$

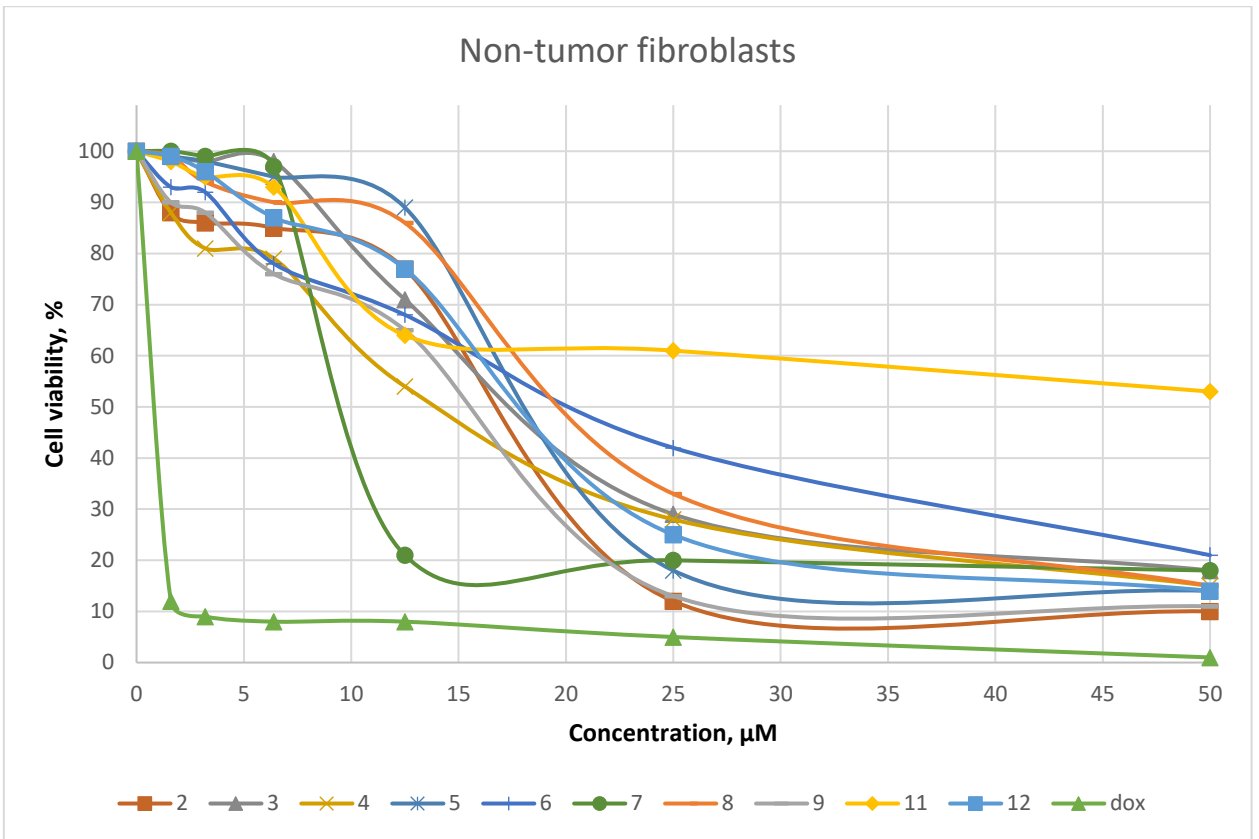

**Figure S41.** The dependence of the survival of non-tumor fibroblasts on the concentration of compounds 2-9, 11, 12

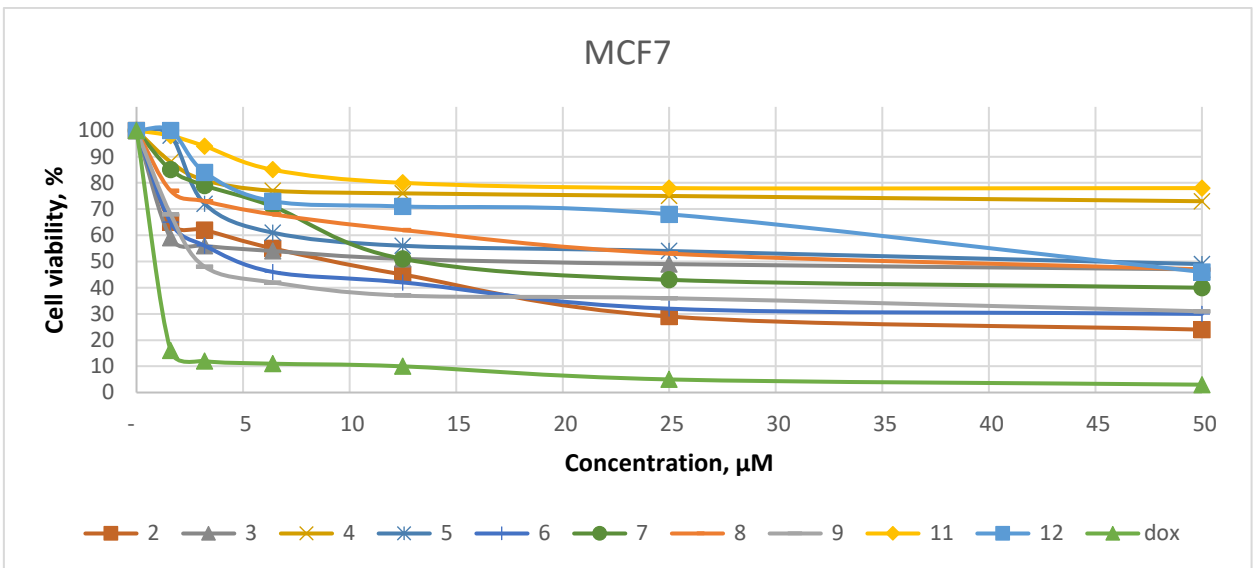

**Figure S42.** Dependence of the survival of breast adenocarcinoma cells on the concentration of compounds 2-9, 11, 12

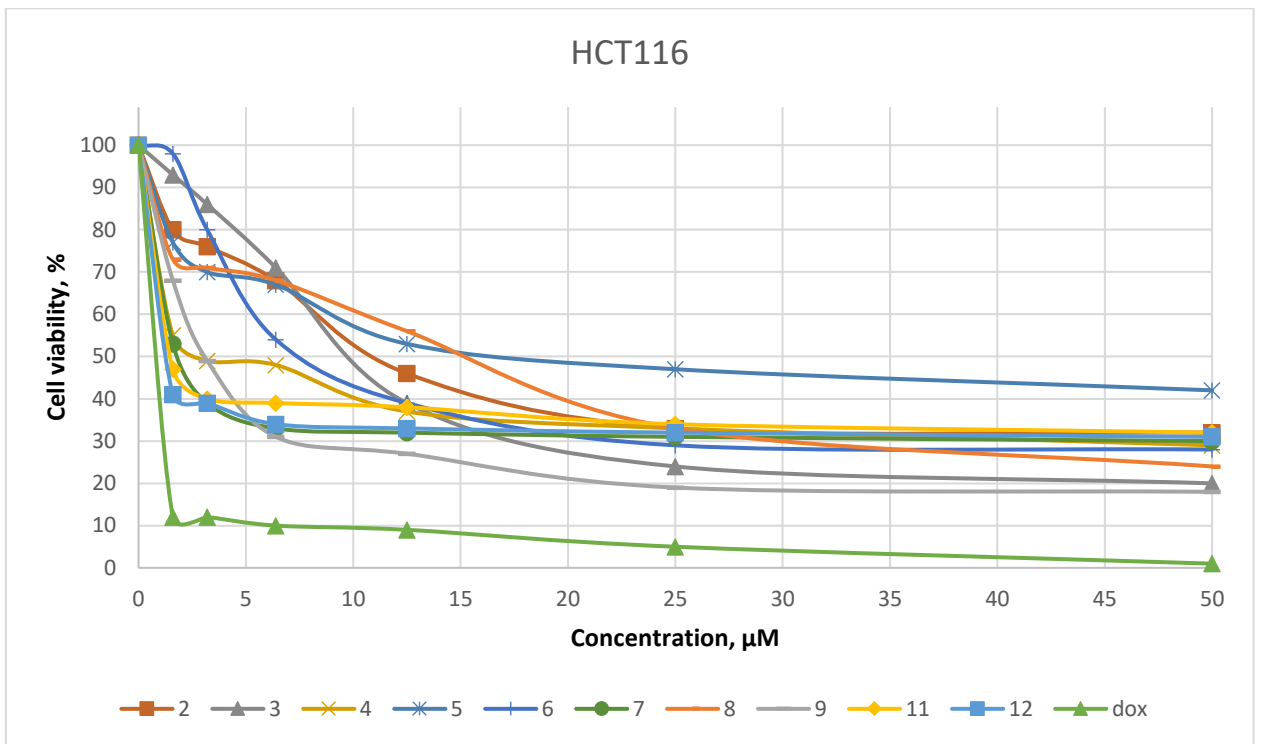

**Figure S43.** Dependence of the survival of colon adenocarcinoma cells on the concentration of compounds 2-9, 11, 12
